# Supplementary material
Source: PubMed Central journal article supplement (PMC2656167)
Supplement: 0812419106_Appendix_PDF.pdf [file 0812419106_Appendix_PDF.pdf]

## SI Appendix

### SPECIES LIST AND METHODS

#### I. Species List

The following list includes the 408 species described since 1993. It includes information on the order, family, author (s), year of description, if the species has a restricted distribution (i.e. equal or less than 50 000 km<sup>2</sup>), and the continent where it is found.

| ORDER/FAMILY                      | REFERENCE                            | RESTRICTED DISTRIBUTION | CONTINENT |
|-----------------------------------|--------------------------------------|-------------------------|-----------|
| <b>Species</b>                    |                                      |                         |           |
| <b>Order Afrosoricida</b>         |                                      |                         |           |
| <b>Family Chrysochloridae</b>     |                                      |                         |           |
| <i>Amblysomus robustus</i>        | Bronner, 2000                        | 1                       | AFRICA    |
| <b>Family Tenrecidae</b>          |                                      |                         |           |
| <i>Microgale dryas</i>            | Jenkins, 1992                        |                         | AFRICA    |
| <i>Microgale fotsifotsy</i>       | Jekins, Raxworthy and Nussbaum, 1997 |                         | AFRICA    |
| <i>Microgale gymnorhyncha</i>     | Jenkins, Goodman and Raxworthy, 1996 |                         | AFRICA    |
| <i>Microgale jenkinsae</i>        | Goodman and Soarimalala, 2004        | 1                       | AFRICA    |
| <i>Microgale jobihely</i>         | Goodman et al., 2006                 | 1                       | AFRICA    |
| <i>Microgale majori</i>           | Olson et al., 2004                   | 1                       | AFRICA    |
| <i>Microgale monticola</i>        | Goodman and Jenkins, 1998            | 1                       | AFRICA    |
| <i>Microgale nasoloi</i>          | Jenkins and Goodman, 1999            | 1                       | AFRICA    |
| <i>Microgale soricoides</i>       | Jenkins, 1993                        |                         | AFRICA    |
| <b>Order Arctiodactyla</b>        |                                      |                         |           |
| <b>Family Bovidae</b>             |                                      |                         |           |
| <i>Damaliscus superstes</i>       | Cotterill, 2003                      | 1                       | AFRICA    |
| <i>Kobus anselii</i>              | Cotterill, 2005                      |                         | AFRICA    |
| <i>Pseudoryx nghetinhensis</i>    | Dung et al, 1993                     | 1                       | ASIA      |
| <b>Family Cervidae</b>            |                                      |                         |           |
| <i>Mazama bororo</i>              | Duarte, 1996                         | 1                       | AMERICA   |
| <i>Megamuntiacus vuquangensis</i> | Tuoc et al, 1994                     | 1                       | ASIA      |
| <i>Muntiacus puhoatensis</i>      | Trai, 1997                           |                         | ASIA      |
| <i>Muntiacus putaoensis</i>       | Amato, Egan and Rabinowitz, 1999     |                         | ASIA      |
| <i>Muntiacus truongsongensis</i>  | Giao et al., 1997                    | 1                       | ASIA      |
| <b>Family Suidae</b>              |                                      |                         |           |
| <i>Sus oliveri</i>                | Groves, 1997                         | 1                       | ASIA      |
| <b>Family Tayassuidae</b>         |                                      |                         |           |
| <i>Pecari maximus</i>             | Roosmalen et al. 2005                |                         | AMERICA   |
| <b>Family Tragulidae</b>          |                                      |                         |           |
| <i>Moschiola kathygre</i>         | Groves and Meijaard, 2005            | 1                       | ASIA      |
| <b>Order Carnivora</b>            |                                      |                         |           |
| <b>Family Mustelidae</b>          |                                      |                         |           |
| <i>Mustela formosana</i>          | Lin and Harada, 1998                 | 1                       | ASIA      |
| <b>Family Viverridae</b>          |                                      |                         |           |
| <i>Genetta bourloni</i>           | Gaubert, 2003                        | 1                       | AFRICA    |
| <b>Order Chiroptera</b>           |                                      |                         |           |
| <b>Family Emballonuridae</b>      |                                      |                         |           |
| <i>Emballonura serii</i>          | Flannery, 1994                       | 1                       | ASIA      |
| <i>Emballonura tiavato</i>        | Goodman et al., 2006                 | 1                       | AFRICA    |

|                                     |                                                |   |         |
|-------------------------------------|------------------------------------------------|---|---------|
| <i>Saccopteryx antioquiensis</i>    | Muñoz and Cuartas, 2001                        | 1 | AMERICA |
| <b>Family Hipposideridae</b>        |                                                |   |         |
| <i>Hipposideros boeadii</i>         | Bates et al., 2007                             | 1 | ASIA    |
| <i>Hipposideros edwardshilli</i>    | Flannery and Colgan, 1993                      | 1 | ASIA    |
| <i>Hipposideros hypophyllus</i>     | Kock and Bhat, 1994                            | 1 | ASIA    |
| <i>Hipposideros khaokhouayensis</i> | Guillen-Servent and Francis, 2006              |   | ASIA    |
| <i>Hipposideros khasiana</i>        | Thabah et al., 2006                            | 1 | ASIA    |
| <i>Hipposideros madurae</i>         | Kitchener and Maryanto, 1993                   |   | ASIA    |
| <i>Hipposideros orbiculus</i>       | Francis et al., 1999                           | 1 | ASIA    |
| <i>Hipposideros rotalis</i>         | Francis et al., 1999                           | 1 | ASIA    |
| <i>Hipposideros scutinares</i>      | Robinson et al., 2003                          | 1 | ASIA    |
| <i>Hipposideros sorenseni</i>       | Kitchener and Maryanto, 1993                   |   | ASIA    |
| <b>Family Natalidae</b>             |                                                |   |         |
| <i>Natalus lanatus</i>              | Tejedor, 2005                                  |   | AMERICA |
| <b>Family Molossidae</b>            |                                                |   |         |
| <i>Chaerephon jobimena</i>          | Goodman and Cardiff, 2004                      | 1 | AFRICA  |
| <i>Chaerephon tomensis</i>          | Juste and Ibañez, 1993                         | 1 | AFRICA  |
| <i>Otomops johnstonei</i>           | Kitchener et al., 1992                         | 1 | ASIA    |
| <b>Family Phyllostomidae</b>        |                                                |   |         |
| <i>Anoura cadenai</i>               | Mantilla-Meluk and Baker, 2006                 |   | AMERICA |
| <i>Anoura fistulata</i>             | Muchhala et al., 2005                          | 1 | AMERICA |
| <i>Anoura luismanueli</i>           | Molinari, 1994                                 | 1 | AMERICA |
| <i>Artibeus inomitatus</i>          | Kalko and Handley, 1994                        | 1 | AMERICA |
| <i>Carollia benkeithi</i>           | Solari and Baker, 2006                         | 1 | AMERICA |
| <i>Carollia colombiana</i>          | Cuartas, Muñoz and González, 2001              | 1 | AMERICA |
| <i>Carollia manu</i>                | Pacheco et al., 2004                           | 1 | AMERICA |
| <i>Carollia monohernandezi</i>      | Muñoz-Arango, Cuartas-Calle and Gonzalez, 2004 | 1 | AMERICA |
| <i>Carollia sowelli</i>             | Baker, Solari and Hoffmann, 2002               |   | AMERICA |
| <i>Dermanura inomitata</i>          | Patterson et al., 2003, 2005                   | 1 | AMERICA |
| <i>Lonchophylla cadenai</i>         | Woodman and Timm, 2006                         | 1 | AMERICA |
| <i>Lonchophylla chocoana</i>        | Dávalos, 2004                                  | 1 | AMERICA |
| <i>Lonchophylla fornicata</i>       | Woodman, 2007                                  | 1 | AMERICA |
| <i>Lonchophylla orcesi</i>          | Albuja and Gardner, 2005                       | 1 | AMERICA |
| <i>Lonchophylla pattoni</i>         | Woodman and Timm, 2006                         | 1 | AMERICA |
| <i>Lonchorhina inusitata</i>        | Handley and ochoa, 1997                        |   | AMERICA |
| <i>Lophostoma aequatorialis</i>     | Baker et al., 2004                             | 1 | AMERICA |
| <i>Lophostoma yasuni</i>            | Fonseca and Pinto, 2004                        | 1 | AMERICA |
| <i>Micronycteris brosetti</i>       | Simmons and Voss, 1998                         | 1 | AMERICA |
| <i>Micronycteris matses</i>         | Simmons, Voss and Fleck, 2002                  |   | AMERICA |
| <i>Micronycteris sanborni</i>       | Simmons, 1996                                  | 1 | AMERICA |
| <i>Platyrrhinus albericoi</i>       | Velazco, 2005                                  | 1 | AMERICA |
| <i>Platyrrhinus ismaeli</i>         | Velazco, 2005                                  |   | AMERICA |
| <i>Platyrrhinus masu</i>            | Velazco, 2005                                  |   | AMERICA |
| <i>Platyrrhinus matapalensis</i>    | Velazco, 2005                                  |   | AMERICA |
| <i>Sturnira koopmanhilli</i>        | McCarthy et al., 2007                          | 1 | AMERICA |
| <i>Sturnira mistratensis</i>        | Vega and Cadena, 2000                          | 1 | AMERICA |
| <i>Sturnira sorianoi</i>            | Sanchez et al., 2005                           | 1 | AMERICA |
| <i>Xeronycteris vieirai</i>         | Gregorin and Ditchfield, 2005                  | 1 | AMERICA |
| <b>Family Pteropodidae</b>          |                                                |   |         |
| <i>Dyacopectera rickarti</i>        | Helgen et al., 2007                            | 1 | ASIA    |
| <i>Epomophorus anelli</i>           | Bergmans and Strien 2004                       | 1 | AFRICA  |
| <i>Melonycteris fardoulisi</i>      | Flannery, 1993                                 | 1 | ASIA    |

|                                 |                                    |   |         |
|---------------------------------|------------------------------------|---|---------|
| <i>Mirimiri acrodonta</i>       | Helgen, 2005                       | 1 | ASIA    |
| <i>Nyctimene keasti</i>         | Kitchener, 1993                    | 1 | ASIA    |
| <i>Paranyctimene tenax</i>      | Bergans, 2001                      |   | ASIA    |
| <i>Pteralopex flanneryi</i>     | Helgen, 2005                       | 1 | ASIA    |
| <i>Pteralopex taki</i>          | Parnaby, 2002                      | 1 | ASIA    |
| <i>Pteropus banakrisi</i>       | Richards and Hall, 2002            | 1 | ASIA    |
| <i>Rhinolophus chiewkweeae</i>  | Yoshiyuki and Lim, 2005            | 1 | ASIA    |
| <i>Rousettus linduensis</i>     | Maryanto and Yani, 2003            | 1 | ASIA    |
| <i>Styloctenium mindorensis</i> | Esselstyn, 2007                    | 1 | ASIA    |
| <b>Family Rhinolophidae</b>     |                                    |   |         |
| <i>Rhinolophus convexus</i>     | Csorba, 1997                       | 1 | ASIA    |
| <i>Rhinolophus maendeleo</i>    | Kock, Csorba and Howell, 2000      | 1 | AFRICA  |
| <i>Rhinolophus sakejiensis</i>  | Cotterill, 2002                    | 1 | AFRICA  |
| <i>Rhinolophus ziama</i>        | Fahr et al., 2002                  | 1 | AFRICA  |
| <b>Family Vespertilionidae</b>  |                                    |   |         |
| <i>Arielulus aureocollaris</i>  | Kock and Storch, 1996              |   | ASIA    |
| <i>Arielulus torquatus</i>      | Csorba and Lee, 1999               | 1 | ASIA    |
| <i>Eptesicus taddeii</i>        | Miranda et al., 2006               | 1 | AMERICA |
| <i>Glauconycteris curryae</i>   | Eger and Schlitter, 2001           |   | AFRICA  |
| <i>Harpioala isodon</i>         | Kuo, Fang, Csorba and Lee, 2006    | 1 | ASIA    |
| <i>Histiotus humboldti</i>      | Handley, 1996                      |   | AMERICA |
| <i>Kerivoula harrisoni</i>      | Csorba and Bates, 2005             | 1 | ASIA    |
| <i>Kerivoula kachinensis</i>    | Bates et al., 2004                 | 1 | ASIA    |
| <i>Kerivoula krauensis</i>      | Francis, Kingston and Zubaid, 2007 | 1 | ASIA    |
| <i>Lasiurus atratus</i>         | Handley, 1996                      | 1 | AMERICA |
| <i>Lasiurus ebenus</i>          | Fazzolari-Correa, 1994             | 1 | AMERICA |
| <i>Miniopterus gleni</i>        | Peterson, Eger and Mitchell, 1995  |   | AFRICA  |
| <i>Miniopterus sororculus</i>   | Goodman et al., 2007               | 1 | AFRICA  |
| <i>Murina harrisoni</i>         | Csorba and Bates, 2005             | 1 | AMERICA |
| <i>Murina ryukyuana</i>         | Maeda and Matsumura, 1998          | 1 | ASIA    |
| <i>Myotis alcaethoe</i>         | Von Helversen and Heller, 2001     |   | ASIA    |
| <i>Myotis annamiticus</i>       | Kruskop and Tsytsulina, 2001       | 1 | ASIA    |
| <i>Myotis csorbai</i>           | Topal, 1997                        |   | ASIA    |
| <i>Myotis dieteri</i>           | Happold, 2005                      | 1 | ASIA    |
| <i>Myotis gomotongensis</i>     | Francis and Hill, 1998             | 1 | ASIA    |
| <i>Myotis yanbarensis</i>       | Maeda and Matsunura, 1998          | 1 | ASIA    |
| <i>Nyctophilus nebulosus</i>    | Parnaby, 2002                      | 1 | ASIA    |
| <i>Pipistrellus hanaki</i>      | Hulva and Benda, 2004              |   | ASIA    |
| <i>Plecotus alpinus</i>         | Kiefer and Veith, 2002             |   | ASIA    |
| <i>Plecotus balensis</i>        | Kruskop and Lavrenchenko, 2000     | 1 | AFRICA  |
| <i>Plecotus sardus</i>          | Mucedda et al., 2002               | 1 | EUROPE  |
| <i>Plecotus strelkovi</i>       | Spitzenberger, 2006                | 1 | EUROPE  |
| <i>Rhogeessa hussoni</i>        | Genoways and Baker, 1996           | 1 | AMERICA |
| <i>Scotophilus marovaza</i>     | Goodman et al., 2006               | 1 | AFRICA  |
| <i>Scotophilus tandrefana</i>   | Goodman et al., 2005               | 1 | AFRICA  |
| <b>Family Thyropteridae</b>     |                                    |   |         |
| <i>Thyroptera devivoi</i>       | Gregorin et al., 2006              | 1 | AMERICA |
| <i>Thyroptera lavalii</i>       | Pine, 1993                         | 1 | AMERICA |
| <b>Order Cingulata</b>          |                                    |   |         |
| <b>Family Dasypodidae</b>       |                                    |   |         |
| <i>Dasypus yepesi</i>           | Vizcaíno, 1995                     | 1 | AMERICA |
| <b>Order Dasyuromorphia</b>     |                                    |   |         |

|                                    |                                         |   |                  |
|------------------------------------|-----------------------------------------|---|------------------|
| <b>Family Dasyuridae</b>           |                                         |   |                  |
| <i>Antechinus agilis</i>           | Dickman, Parnaby; Crowter and Kin, 1998 |   | AUSTRALIA        |
| <i>Antechinus subtropicus</i>      | Van Dyck and Crowther, 2000             |   | AUSTRALIA        |
| <i>Myoictis leucura</i>            | Woolley, 2005                           | 1 | PAPUA NEW GUINEA |
| <i>Pseudantechinus roryi</i>       | Cooper, Aplin and Adams, 2000           |   | AUSTRALIA        |
| <i>Sminthopsis bindi</i>           | Van Dyck, Woinarski and Press, 1994     |   | AUSTRALIA        |
| <i>Sminthopsis boullangarensis</i> | Crowther Dickman and Lynam, 1999        | 1 | AUSTRALIA        |
| <b>Order Didelphimorphia</b>       |                                         |   |                  |
| <b>Family Didelphidae</b>          |                                         |   |                  |
| <i>Philander deltae</i>            | Lew et al., 2006                        | 1 | AMERICA          |
| <i>Philander mondolfi</i>          | Lew et al., 2006                        | 1 | AMERICA          |
| <b>Familia Marmosidae</b>          |                                         |   |                  |
| <i>Gracilinanus ignitus</i>        | Díaz, Flores and Barquez, 2002          | 1 | AMERICA          |
| <i>Marmosops creightoni</i>        | Voss et al 2004                         | 1 | AMERICA          |
| <i>Hyladelphys kalinowskii</i>     | Hershkovitz, 1992                       | 1 | AMERICA          |
| <i>Monodelphis handleyi</i>        | Solari, 2007                            | 1 | AMERICA          |
| <i>Monodelphis reigi</i>           | Lew and Perez-Hernández, 2004           | 1 | AMERICA          |
| <i>Monodelphis ronaldi</i>         | Solari, 2003                            | 1 | AMERICA          |
| <b>Order Diprodontia</b>           |                                         |   |                  |
| <b>Family Macropodidae</b>         |                                         |   |                  |
| <i>Dendrolagus mbaiso</i>          | Flannery, Boedi and Szalay, 1995        | 1 | PAPUA NEW GUINEA |
| <i>Dendrolagus pulcherrimus</i>    | Flannery, 1993                          | 1 | PAPUA NEW GUINEA |
| <i>Petrogale coenensis</i>         | Eldredge and Close, 1992                | 1 | AUSTRALIA        |
| <i>Petrogale mareeba</i>           | Eldredge and Close, 1992                | 1 | AUSTRALIA        |
| <i>Petrogale sharmani</i>          | Eldredge and Close, 1992                | 1 | AUSTRALIA        |
| <i>Thylogale calabyi</i>           | Flannery, 1992                          | 1 | PAPUA NEW GUINEA |
| <b>Family Phalangeridae</b>        |                                         |   |                  |
| <i>Phalanger alexandrae</i>        | Flannery and Boeadi, 1995               | 1 | PAPUA NEW GUINEA |
| <i>Phalanger matabiru</i>          | Flannery and Boeadi, 1995               | 1 | PAPUA NEW GUINEA |
| <i>Spilocuscus wilsoni</i>         | Helgen and Flannery, 2004b              | 1 | PAPUA NEW GUINEA |
| <i>Trichosurus caninus</i>         | Lindenmayer et al., 2002                | 1 | AUSTRALIA        |
| <i>Trichosurus cunninghami</i>     | Lindenmayer, Dubach and Viggers, 2002   | 1 | AUSTRALIA        |
| <b>Order Erinaceomorpha</b>        |                                         |   |                  |
| <b>Family Erinaceidae</b>          |                                         |   |                  |
| <i>Hylomys megalotis</i>           | Jenkins and M. F. Robinson, 2002        | 1 | PAPUA NEW GUINEA |
| <b>Order Lagomorpha</b>            |                                         |   |                  |
| <b>Family Leporidae</b>            |                                         |   |                  |
| <i>Nesolagus timminsi</i>          | Averinov, Abramov and Tikhonov, 2000    | 1 | ASIA             |
| <i>Sylvilagus obscurus</i>         | Chapman et al, 1992                     |   | AMERICA          |
| <i>Sylvilagus varynaensis</i>      | Durant and Guevara, 2001                | 1 | AMERICA          |
| <b>Family Ochotonidae</b>          |                                         |   |                  |
| <i>Ochotona hoffmanni</i>          | Fromosov, 1996                          |   | ASIA             |
| <i>Ochotona nigrita</i>            | Gong et al., 2000                       | 1 | ASIA             |
| <b>Order Monotremata</b>           |                                         |   |                  |
| <b>Family Tachyglossidae</b>       |                                         |   |                  |
| <i>Zaglossus attenboroughi</i>     | Flannery and Groves, 1998               | 1 | PAPUA NEW GUINEA |
| <b>Order Paucituberculata</b>      |                                         |   |                  |

|                                 |                                         |   |           |
|---------------------------------|-----------------------------------------|---|-----------|
| <b>Family Caenolestidae</b>     |                                         |   |           |
| <i>Caenolestes condorensis</i>  | Albuja and Patterson, 1996              | 1 | AMERICA   |
| <b>Order Peramelemorphia</b>    |                                         |   |           |
| <b>Family Peramelidae</b>       |                                         |   |           |
| <i>Microperoryctes aplini</i>   | Helgen and Flannery, 2004               | 1 | AUSTRALIA |
| <i>Microperoryctes ornata</i>   | Helgen and Flannery, 2004               | 1 | AUSTRALIA |
| <b>Order Pilosa</b>             |                                         |   |           |
| <b>Family Bradypodidae</b>      |                                         |   |           |
| <i>Bradypus pygmaeus</i>        | Anderson and Handley, 2001              | 1 | AMERICA   |
| <b>Order Primates</b>           |                                         |   |           |
| <b>Familia Cebidae</b>          |                                         |   |           |
| <i>Callithrix acariensis</i>    | van Roosmalen et al, 2000               | 1 | AMERICA   |
| <i>Callithrix humilis</i>       | van Roosmalen et al, 1998               | 1 | AMERICA   |
| <i>Callithrix manicorensis</i>  | van Roosmalen et al, 2000               | 1 | AMERICA   |
| <i>Callithrix marcai</i>        | Alperin, 1993                           |   | AMERICA   |
| <i>Callithrix mauesi</i>        | Mittermeier, Schwarz and Ayres, 1992    | 1 | AMERICA   |
| <i>Callithrix nigriceps</i>     | Ferrari and Lopes, 1992                 | 1 | AMERICA   |
| <i>Callithrix saterei</i>       | Silva and Noronha, 1998                 | 1 | AMERICA   |
| <i>Cebus kaapori</i>            | Queiroz, 1992                           |   | AMERICA   |
| <i>Cebus querozi</i>            | Mendes Pontes et al., 2006              | 1 | AMERICA   |
| <b>Family Cercopithecidae</b>   |                                         |   |           |
| <i>Macaca munzala</i>           | Sinha et al., 2005                      | 1 | ASIA      |
| <i>Macaca siberu</i>            | Fuentes and Olson, 1995                 | 1 | ASIA      |
| <i>Miopithecus ogouensis</i>    | Kingdon, 1997                           | 1 | AFRICA    |
| <i>Trachypithecus ebenus</i>    | Brandon-Jones, 1995                     |   |           |
| <i>Pygathrix cinerea</i>        | Nadler, 1997                            | 1 | ASIA      |
| <i>Rungwecebus kipunji</i>      | Ehardt et al., 2005                     | 1 | AFRICA    |
| <b>Family Cheirogaleidae</b>    |                                         |   |           |
| <i>Cheirogaleus minusculus</i>  | Groves, 2000                            | 1 | AFRICA    |
| <i>Cheirogaleus ravsus</i>      | Groves, 2000                            | 1 | AFRICA    |
| <i>Microcebus berthae</i>       | Rasoloarison, Goodman and Ganzhor, 2000 | 1 | AFRICA    |
| <i>Microcebus jollyae</i>       | Louis et al., 2006                      | 1 | AFRICA    |
| <i>Microcebus lehilahytsara</i> | Kappeler et al. 2005                    | 1 | AFRICA    |
| <i>Microcebus mamiratra</i>     | Rambintintsoa et al., 2006              | 1 | AFRICA    |
| <i>Microcebus mittermeieri</i>  | Louis et al., 2006                      | 1 | AFRICA    |
| <i>Microcebus ravelobensis</i>  | Zimmermann et al, 1997                  | 1 | AFRICA    |
| <i>Microcebus sambiranensis</i> | Rasoloarison, Goodman and Ganzhor, 2000 | 1 | AFRICA    |
| <i>Microcebus simmonsii</i>     | Louis et al., 2006                      | 1 | AFRICA    |
| <i>Microcebus tavarata</i>      | Rasoloarison, Goodman and Ganzhor, 2000 | 1 | AFRICA    |
| <i>Mirza zaza</i>               | Kappeler and Roos, 2005                 | 1 | AFRICA    |
| <b>Family Galagidae</b>         |                                         |   |           |
| <i>Galago batesi</i>            | Ambrose, 2003                           |   | AFRICA    |
| <i>Galago rondoensis</i>        | Honess, 1997                            | 1 | AFRICA    |
| <i>Galago udzungwensis</i>      | Kingdon, 1997                           | 1 | AFRICA    |
| <b>Family Indridae</b>          |                                         |   |           |
| <i>Avahi cleesei</i>            | Thalmann and Geissmann, 2005.           | 1 | AFRICA    |
| <i>Avahi unicolor</i>           | Thelmann and Geissmann, 2000            | 1 | AFRICA    |
| <b>Family Lemuridae</b>         |                                         |   |           |
| <i>Lepilemur aeeclis</i>        | Andriaholinirina et al., 2006           | 1 | AFRICA    |
| <i>Lepilemur ahmansonii</i>     | Louis et al., 2006                      | 1 | AFRICA    |
| <i>Lepilemur betsileo</i>       | Louis et al., 2006                      | 1 | AFRICA    |
| <i>Lepilemur fleuretae</i>      | Louis et al., 2006                      | 1 | AFRICA    |

|                                        |                                                    |   |              |
|----------------------------------------|----------------------------------------------------|---|--------------|
| <i>Lepilemur grewcocki</i>             | Louis et al., 2006                                 | 1 | AFRICA       |
| <i>Lepilemur hubbardi</i>              | Louis et al., 2006                                 | 1 | AFRICA       |
| <i>Lepilemur jamesi</i>                | Louis et al., 2006                                 | 1 | AFRICA       |
| <i>Lepilemur milanoii</i>              | Louis et al., 2006                                 | 1 | AFRICA       |
| <i>Lepilemur petteri</i>               | Louis et al., 2006                                 | 1 | AFRICA       |
| <i>Lepilemur randrianasoli</i>         | Andriaholinirina et al., 2006                      | 1 | AFRICA       |
| <i>Lepilemur sahamalazensis</i>        | Andriaholinirina et al., 2006                      | 1 | AFRICA       |
| <i>Lepilemur seali</i>                 | Andriaholinirina et al., 2006                      |   | AFRICA       |
| <i>Lepilemur tymerlachsoni</i>         | Louis et al., 2006                                 | 1 | AFRICA       |
| <i>Lepilemur wrighti</i>               | Louis et al., 2006                                 | 1 | AFRICA       |
| <b>Family Lorisiidae</b>               |                                                    |   |              |
| <i>Pseudopotto martini</i>             | Schwartz, 1996                                     | 1 | AFRICA       |
| <b>Family Pitheciidae</b>              |                                                    |   |              |
| <i>Callicebus aureipalatii</i>         | buscar autor de referencia no esta en Patterson    | 1 | AMERICA      |
| <i>Callicebus bernhardi</i>            | Van Roosmalen, Van Roosmalen and Mittermeier, 2002 |   | AMERICA      |
| <i>Callicebus coimbrai</i>             | Kobayashi and Langguth, 1999                       | 1 | AMERICA      |
| <i>Callicebus stephennashi</i>         | Van Roosmalen, Van Roosmalen and Mittermeier, 2002 | 1 | AMERICA      |
| <b>Family Tarsiidae</b>                |                                                    |   |              |
| <i>Tarsius lariang</i>                 | Merker and Groves, 2006                            | 1 | ASIA         |
| <i>Tarsius pelegensis</i>              | Groves, 2001                                       | 1 | ASIA         |
| <i>Tarsius sangirensis</i>             | Groves, 2001                                       | 1 | ASIA         |
| <b>Order Macroscelidae</b>             |                                                    |   |              |
| <b>Family Macroscelididae</b>          |                                                    |   |              |
| <i>Rhyncocyon udzunwensis</i>          | Rovero et al., 2008                                |   | AFRICA       |
| <b>Order Rodentia</b>                  |                                                    |   |              |
| <b>Family Abrocomidae</b>              |                                                    |   |              |
| <i>Abrocoma uspallata</i>              | Braun and Mares, 2002                              | 1 | AMERICA      |
| <i>Cuscomys ashaninka</i>              | Emmons, 1999                                       | 1 | AMERICA      |
| <b>Family Bathyergidae</b>             |                                                    |   |              |
| <i>Cryptomys anomalus</i>              | Colleen, Burda and Honeycutt, 2004                 | 1 | AFRICA       |
| <i>Cryptomys anelli</i>                | Burda et al., 1999                                 | 1 | AFRICA       |
| <i>Cryptomys choma</i>                 | Bennet and Faulkes, 2000                           | 1 | AFRICA       |
| <i>Cryptomys kafuensis</i>             | Burda et al., 1999                                 | 1 | AFRICA       |
| <i>Cryptomys micklemi</i>              |                                                    | 1 | EUROPE, ASIA |
| <i>Cryptomys whytei</i>                | Van Daele et al., 2004                             | 1 | AFRICA       |
| <b>Family Caviidae</b>                 |                                                    |   |              |
| <i>Cavia intermedia</i>                | Cherem, Olimpio and Ximenez, 1999                  | 1 | AMERICA      |
| <i>Galea monasteriensis</i>            | Solmsdorff et al. 2004                             | 1 | AMERICA      |
| <i>Kerodon acrobata</i>                | Moojen, Locks and Langguth, 1997                   | 1 | AMERICA      |
| <b>Family Cricetidae</b>               |                                                    |   |              |
| <i>Aepeomys reigi</i>                  | Ochoa, Aguilera, Pacheco and Soriano, 2001         | 1 | AMERICA      |
| <i>Akodon aliquantulus</i>             | Díaz, Barquez, Braun and Mares, 1999               | 1 | AMERICA      |
| <i>Akodon mystax</i>                   | Hershkovitz, 1998                                  | 1 | AMERICA      |
| <i>Akodon oenos</i>                    | Braun, Mares and Ojeda, 2000                       | 1 | AMERICA      |
| <i>Akodon paranaensis</i>              | Christoff, Fagundes et al., 2000                   |   | AMERICA      |
| <i>Akodon philipmyersi</i>             | Pardiñas et al., 2005                              | 1 | AMERICA      |
| <i>Akodon reigi</i>                    | González, Langguth and Oliveira, 1998              |   | AMERICA      |
| <i>Amphinectomys savamis</i>           | Malygin, 1994                                      | 1 | AMERICA      |
| <i>Andalgalomys roigi</i>              | Mares and Braun, 1996                              |   | AMERICA      |
| <i>Bucepattersonius albinasus</i>      | Hershkovitz, 1998                                  | 1 | AMERICA      |
| <i>Bucepattersonius griserufescens</i> | Hershkovitz, 1998                                  | 1 | AMERICA      |

|                                      |                                         |   |         |
|--------------------------------------|-----------------------------------------|---|---------|
| <i>Brucepattersonius guarani</i>     | Mares and Braun, 2000                   | 1 | AMERICA |
| <i>Brucepattersonius igniventris</i> | Hershkovitz, 1998                       | 1 | AMERICA |
| <i>Brucepattersonius misionensis</i> | Mares and Braun, 2000                   | 1 | AMERICA |
| <i>Brucepattersonius paradisus</i>   | Mares and Braun, 2000                   | 1 | AMERICA |
| <i>Brucepattersonius soricinus</i>   | Hershkovitz, 1998                       | 1 | AMERICA |
| <i>Calomys tocanzini</i>             | Bonvicino, Lima and Almeida, 2003       |   | AMERICA |
| <i>Chibchanomys orcesi</i>           | Jenkins and Barnett, 1997               | 1 | AMERICA |
| <b>Family Ctenomyidae</b>            |                                         |   |         |
| <i>Ctenomys cohaiquensis</i>         | Kelt and Gallardo, 1994                 | 1 | AMERICA |
| <i>Ctenomys lami</i>                 | Freitas, 2001                           | 1 | AMERICA |
| <i>Ctenomys osvaldoreigi</i>         | Contreras, 1995                         | 1 | AMERICA |
| <i>Ctenomys pilarensis</i>           | Contreras, 1993                         | 1 | AMERICA |
| <i>Ctenomys rosendopascuali</i>      | Patterson et al. 2003                   | 1 | AMERICA |
| <i>Ctenomys scagliai</i>             | Contreras, 1999                         | 1 | AMERICA |
| <i>Echimys vieirai</i>               | lack-Ximenes et al., 2005               | 1 | AMERICA |
| <b>Family Echimyidae</b>             |                                         |   |         |
| <i>Habromys delicatulus</i>          | Carleton, Sanchez and Urbano Vida, 2002 | 1 | AMERICA |
| <i>Habromys schmidlyi</i>            | Romo-Vazquez, 2005                      | 1 | AMERICA |
| <i>Handleyomys fuscatus</i>          | Voss, 2002                              | 1 | AMERICA |
| <i>Isothrix barbarabrownae</i>       | Patterson and Velazco, 2003             |   |         |
| <i>Isothrix sinnamariensis</i>       | Vié et al.,                             | 1 | AMERICA |
| <i>Juliomys rimofrons</i>            | Oliveira and Bonvicino, 2002            | 1 | AMERICA |
| <i>Juscelinomys guaporensis</i>      | Emmons, 1999                            | 1 | AMERICA |
| <i>Juscelinomys huanchacae</i>       | Emmons, 1999                            | 1 | AMERICA |
| <i>Loxodontomys pikumche</i>         | Spotorno et al., 1998                   |   | AMERICA |
| <i>Mesomys occultus</i>              | Patton, da Silva and Malcolm, 2000      | 1 | AMERICA |
| <i>Microakodontomys transitorius</i> | Hershkovitz, 1993                       | 1 | AMERICA |
| <i>Microtus anatolicus</i>           | Krystufek and Kefelioglu, 2002          |   | ASIA    |
| <i>Microtus dogramacii</i>           | Kefelioglu and Krystufek, 1999          | 1 | ASIA    |
| <i>Microtus gazvinensis</i>          | Golenishchev, 2003                      | 1 | ASIA    |
| <i>Neacomys dubosti</i>              | Voss, Lunde and Simmons, 2001           |   | AMERICA |
| <i>Neacomys minutus</i>              | Patton, da Silva and Malcolm, 2000      |   | AMERICA |
| <i>Neacomys musseri</i>              | Patton, da Silva and Malcolm, 2000      | 1 | AMERICA |
| <i>Neacomys paracou</i>              | Voss, Lunde and Simmons, 2001           |   | AMERICA |
| <i>Neusticomys ferreirai</i>         | Percequillo et al., 2005                | 1 | AMERICA |
| <i>Oligoryzomys brendae</i>          | Massoia, 1998                           | 1 | AMERICA |
| <i>Oligoryzomys fornesi</i>          | Weksler and Bonvicino, 2005             |   | AMERICA |
| <i>Oligoryzomys moojeni</i>          | Weksler and Bonvicino, 2005             | 1 | AMERICA |
| <i>Oligoryzomys rupestris</i>        | Weksler and Bonvicino, 2005             | 1 | AMERICA |
| <i>Oligoryzomys stramineus</i>       | Bonvicino and Weksler, 1998             |   | AMERICA |
| <i>Oryzomys acritus</i>              | Emmons and Patton, 2005                 | 1 | AMERICA |
| <i>Oryzomys andersoni</i>            | Brooks et al., 2004                     | 1 | AMERICA |
| <i>Oryzomys curasoae</i>             | McFarlane and Debrot, 2001              | 1 | AMERICA |
| <i>Oryzomys emmonsae</i>             | Musser et al., 1998                     |   | AMERICA |
| <i>Oryzomys maracajuensis</i>        | Langguth and Bonvicino, 2002            | 1 | AMERICA |
| <i>Oryzomys marinhos</i>             | Bonvicino, 2003                         | 1 | AMERICA |
| <i>Oryzomys scotti</i>               | Langguth and Bonvicino, 2002            | 1 | AMERICA |
| <i>Oryzomys seuanezi</i>             | Weksler, Geise and Cerqueira, 1999      |   | AMERICA |
| <i>Oryzomys tatei</i>                | Musser et al., 1998                     | 1 | AMERICA |
| <i>Oxymycterus amazonicus</i>        | Hershkovitz, 1994                       |   | AMERICA |
| <i>Oxymycterus caparaoe</i>          | Hershkovitz, 1998                       | 1 | AMERICA |
| <i>Oxymycterus josei</i>             | Hoffmann, Lessa and Smith, 2002         | 1 | AMERICA |

|                                        |                                                         |   |              |
|----------------------------------------|---------------------------------------------------------|---|--------------|
| <i>Pearsonomys annectens</i>           | Patterson, 1992                                         | 1 | AMERICA      |
| <i>Peromyscus schmidlyi</i>            | Bradley et al., 2004                                    | 1 | AMERICA      |
| <i>Phyllomys lundii</i>                | Leite, 2003                                             | 1 | AMERICA      |
| <i>Phyllomys mantiqueirensis</i>       | Leite, 2003                                             | 1 | AMERICA      |
| <i>Phyllomys pattoni</i>               | Emmons, Leite, Kock and Costa, 2002                     |   | AMERICA      |
| <i>Pipanacoctomys aureas</i>           | Mares, Braun, Barquez and Díaz, 2000                    | 1 | AMERICA      |
| <i>Proechimys barinas</i>              | Aguilera and Corti, 1994                                |   | AMERICA      |
| <i>Proechimys echinothrix</i>          | Da Silva, 1998                                          |   | AMERICA      |
| <i>Proechimys gardneri</i>             | Da Silva, 1998                                          |   | AMERICA      |
| <i>Proechimys kulinae</i>              | Da Silva, 1998                                          |   | AMERICA      |
| <i>Proechimys moojeni</i>              | Pessoa and Reis, 1992                                   | 1 | AMERICA      |
| <i>Proechimys pattoni</i>              | Da Silva, 1998                                          |   | AMERICA      |
| <i>Proechymys yonenagae</i>            | Rocha, 1995                                             | 1 | AMERICA      |
| <i>Punomys kofordi</i>                 | Pacheco and Patton, 1995                                | 1 | AMERICA      |
| <i>Reithrodontomys bakeri</i>          | Bradley, Mendez-Harclerode, Hamilton and Ceballos, 2004 | 1 | AMERICA      |
| <i>Rhipidomys cariri</i>               | Tribe, 2005                                             | 1 | AMERICA      |
| <i>Rhipidomys gardneri</i>             | Patton, da Silva and Malcolm, 2000                      | 1 | AMERICA      |
| <i>Rhynchomys banahao</i>              | Balete et al., 2007                                     | 1 | EUROPA, ASIA |
| <i>Rhynchomys tapulao</i>              | Balete et al., 2007                                     | 1 | EUROPA, ASIA |
| <i>Salinoctomys loschalchalersorum</i> | Mares, Braun, Barquez and Díaz, 2000                    | 1 | AMERICA      |
| <i>Salinomys delicatus</i>             | Braun and Mares, 1995                                   | 1 | AMERICA      |
| <i>Saxatilomys paulinae</i>            | Musser et al., 2005                                     | 1 | EUROPE, ASIA |
| <i>Scolomys juruaense</i>              | Patton and Da Silva, 1995                               |   | AMERICA      |
| <i>Tapecomys primus</i>                | Anderson and Yates, 2000                                | 1 | AMERICA      |
| <i>Thomasomys apeco</i>                | Leo L and Gardner, 1993                                 | 1 | AMERICA      |
| <i>Thomasomys macrotis</i>             | Gadner and Romo, 1993                                   | 1 | AMERICA      |
| <i>Thomasomys onkiro</i>               | Luna and Pacheco, 2002                                  | 1 | AMERICA      |
| <i>Thomasomys ucucha</i>               | Voss, 2003                                              |   | AMERICA      |
| <i>Trinomys eliasi</i>                 | Pessoa and Reis, 1993                                   | 1 | AMERICA      |
| <i>Trinomys mirapitanga</i>            | Lara, Patton and Hingst-Zaher, 2002                     | 1 | AMERICA      |
| <i>Wiedomys cerradensis</i>            | Goncalves, Almeida and Bonvicino, 2005                  | 1 | AMERICA      |
| <b>Family Erethizontidae</b>           |                                                         |   |              |
| <i>Coendou sneiderni</i>               |                                                         | 1 | AMERICA      |
| <i>Sphiggurus ichillus</i>             | Voss and da Silva, 2001                                 | 1 | AMERICA      |
| <i>Sphiggurus roosmalenorum</i>        | Voss and da Silva, 2001                                 | 1 | AMERICA      |
| <b>Family Gliridae</b>                 |                                                         |   |              |
| <i>Dryomys niethammeri</i>             | Holden, 1996                                            | 1 | EUROPE, ASIA |
| <b>Family Heteromyidae</b>             |                                                         |   |              |
| <i>Heteromys nubicolens</i>            | Anderson and Timm, 2006                                 | 1 | AMERICA      |
| <i>Heteromys oasisicus</i>             | Anderson, 2003                                          | 1 | AMERICA      |
| <i>Heteromys teleus</i>                | Anderson and Jarrín, 2002                               | 1 | AMERICA      |
| <b>Family (Laonastidae)</b>            |                                                         |   |              |
| <b>Diatomidae</b>                      |                                                         |   |              |
| <i>Laonastes aenigmamus</i>            | Jenkis et al., 2005                                     | 1 | ASIA         |
| <b>Family Muridae</b>                  |                                                         |   |              |
| <i>Apomys camiguinensis</i>            | Heaney et al., 2006                                     | 1 | ASIA         |
| <i>Apomys gracilirostris</i>           | Ruedas, 1995                                            | 1 | ASIA         |
| <i>Archboldomys musseri</i>            | Rickart, Heaney, Tabaranza and Balete, 1998             | 1 | ASIA         |
| <i>Batomys russatus</i>                | Musser, Heaney and Tabaranza, 1998                      | 1 | ASIA         |
| <i>Bullimus gamay</i>                  | Rickart, Heaney and Tabaranza, 2002                     | 1 | ASIA         |
| <i>Chrotomys sibuyanensis</i>          | Rickart et al., 2005                                    | 1 | ASIA         |



|                                  |                                                   |   |         |
|----------------------------------|---------------------------------------------------|---|---------|
| <i>Crateromys heaneyi</i>        | Gonzales and Kennedy, 1996                        | 1 | ASIA    |
| <i>Crunomys suncooides</i>       | Rickart, Heaney, Tabaranza and Balete, 1998       |   | ASIA    |
| <i>Dasymys cabrali</i>           | Verheyen et al., 2003                             |   | AFRICA  |
| <i>Dasymys robertsii</i>         | Mullin, Pillay, Taylor, 2004                      | 1 | AFRICA  |
| <i>Dasymys rwandae</i>           | Verheyen et al., 2003                             | 1 | AFRICA  |
| <i>Dasymys shortridgei</i>       | Mullin, Pillay, Taylor, 2004                      | 1 | AFRICA  |
| <i>Dasymys sua</i>               | Verheyen et al., 2003                             | 1 | AFRICA  |
| <i>Desmomys yaldeni</i>          | Lavrenchenko, 2003                                | 1 | ASIA    |
| <i>Dipodillus rupicola</i>       | Granjon et al., 2002                              | 1 | AFRICA  |
| <i>Graphiurus rupicola</i>       | Granjon et al., 2002                              | 1 | AFRICA  |
| <i>Hydromys zieglerei</i>        | Helgen, 2005                                      | 1 | ASIA    |
| <i>Hylomyscus arcrimontensis</i> | Carleton and Stanley, 2005                        |   | AFRICA  |
| <i>Hylomyscus denniae</i>        | Carleton et al., 2006                             |   | AFRICA  |
| <i>Limnomys bryophilus</i>       | Rickart, Heaney and Tabaranza, 2003               | 1 | ASIA    |
| <i>Lophuromys angolensis</i>     | Verheyen, Dierckx and Hulselmans, 2000            |   | AFRICA  |
| <i>Lophuromys dieterleni</i>     | Verheyen et al., 1997                             | 1 | AFRICA  |
| <i>Lophuromys dudui</i>          | Verheyen et al., 2002                             |   | AFRICA  |
| <i>Lophuromys huttereri</i>      | Verheyen, Colyn and Hulselmans, 1996              | 1 | AFRICA  |
| <i>Lophuromys roseveari</i>      | Verheyen et al., 1997                             | 1 | AFRICA  |
| <i>Lophuromys simensis</i>       | Verheyen, Hulseelmans, Dierckx and Verheyen, 2002 | 1 | AFRICA  |
| <i>Lophuromys verhageni</i>      | Verheyen et al., 2002                             | 1 | AFRICA  |
| <i>Lophuromys zaphiri</i>        | Verheyen, Hulseelmans, Dierckx and Verheyen, 2002 | 1 | AFRICA  |
| <i>Mastomys awashensis</i>       | Lavrenchenko et al, 1998                          | 1 | ASIA    |
| <i>Melomys bannisteri</i>        | Kitchener and Maryanto, 1993                      | 1 | ASIA    |
| <i>Melomys cooperae</i>          | Kitchener, 1995                                   | 1 | ASIA    |
| <i>Melomys howi</i>              | Kitchener, 1996                                   | 1 | ASIA    |
| <i>Melomys matambuai</i>         | Flannery, Colgan and Trimble, 1994                | 1 | ASIA    |
| <i>Melomys paveli</i>            | Helgen, 2003                                      | 1 | ASIA    |
| <i>Mus cypriacus</i>             | Cucchi et al., 2006                               | 1 | ASIA    |
| <i>Mus fragilicauda</i>          | Auffray et al, 2003                               | 1 | ASIA    |
| <i>Paramelomys gressitti</i>     | Menzies, 1996                                     | 1 | ASIA    |
| <i>Pithecheriops otion</i>       | Emmons, 1993                                      | 1 | ASIA    |
| <i>Proedromys liangshanensis</i> | Liu S; Sun Z., Zeng and Zhao E. 2007              | 1 | ASIA    |
| <i>Praomys degraaffi</i>         | Van der Straeten and Kerbis Peterhans, 1999       | 1 | AFRICA  |
| <i>Praomys petteri</i>           | Van der Straete, Lecompte and Denys, 2003         |   | AFRICA  |
| <i>Pseudohydromys germani</i>    | Helgen, 2005                                      | 1 | ASIA    |
| <i>Rhagomys longilingua</i>      | Luna and Patterson, 2003                          | 1 | AMERICA |
| <i>Sommeromys macrorhinos</i>    | Musser and Durden, 2002                           | 1 | ASIA    |
| <i>Taterillus tranieri</i>       | Dobigny et al, 2003                               |   | AFRICA  |
| <i>Tonkinomys daovantieni</i>    | Musser et al., 2006                               | 1 | ASIA    |
| <i>Uromys boeadii</i>            | Groves and Flannery, 1994                         | 1 | ASIA    |
| <i>Uromys emmae</i>              | Groves and Flannery, 1994                         | 1 | ASIA    |
| <i>Voalavo antsahabensis</i>     | Goodman et al., 2005                              | 1 | AFRICA  |
| <i>Voalavo gymnocaudus</i>       | Craleton and Goodman, 1998                        | 1 | AFRICA  |
| <b>Family Nesomyidae</b>         |                                                   |   |         |
| <i>Eliurus antsingy</i>          | Carleton, Goodman and Rakotondravony, 2001        | 1 | AFRICA  |
| <i>Eliurus danieli</i>           | Carleton and Woodman, 2007                        | 1 | ASIA    |
| <i>Eliurus ellermani</i>         | Carleton, 1994                                    | 1 | AFRICA  |
| <i>Eliurus grandidieri</i>       | Carleton and Goodman, 1998                        | 1 | AFRICA  |
| <i>Eliurus petteri</i>           | Carleton, 1994                                    | 1 | AFRICA  |
| <i>Macrotarsomys petteri</i>     | Goodman and Soarimalala, 2005                     | 1 | AFRICA  |

|                                |                                       |   |         |
|--------------------------------|---------------------------------------|---|---------|
| <i>Monticolomys kopmani</i>    | Carleton and Goodman, 1996            | 1 | AFRICA  |
| <b>Family Octodontidae</b>     |                                       |   |         |
| <i>Octodon pacificus</i>       | Hutterer, 1994                        | 1 | AMERICA |
| <b>Family Sciuridae</b>        |                                       |   |         |
| <i>Spermophilus taurensis</i>  | Gündüz et al., 2007                   | 1 | ASIA    |
| <b>Family Spalacidae</b>       |                                       |   |         |
| <i>Spalax carmeli</i>          | Nevo, Ivanitskaya an Beiles, 2001     | 1 | ASIA    |
| <i>Spalax galili</i>           | Nevo, Ivanitskaya an Beiles, 2001     | 1 | ASIA    |
| <i>Spalax golani</i>           | Nevo, Ivanitskaya an Beiles, 2001     | 1 | ASIA    |
| <i>Spalax judaei</i>           | Nevo, Ivanitskaya an Beiles, 2001     | 1 | ASIA    |
| <i>Spalax munzuri</i>          | Coskun, 2004                          | 1 | ASIA    |
| <b>Order Soricomorpha</b>      |                                       |   |         |
| <b>Family Soricidae</b>        |                                       |   |         |
| <i>Chodsigoa caovansunga</i>   | Lunde, Musser and Son, 2003           | 1 | ASIA    |
| <i>Congosorex phillipsorum</i> | Stanley, Rogers and Hutterer, 2005    | 1 | AFRICA  |
| <i>Congosorex verheyeni</i>    | Hutterer, Barriere and Colym, 2002    |   | AFRICA  |
| <i>Crocidura desperata</i>     | Hutterer,, Jenkins and Verheyen, 1991 | 1 | AFRICA  |
| <i>Crocidura hilliana</i>      | Jenkins and Smith, 1995               | 1 | ASIA    |
| <i>Crocidura hutanis</i>       | Ruedi and Vogel, 1995                 |   | ASIA    |
| <i>Crocidura kegoensis</i>     | Lunde, Musser and Ziegler, 2004       | 1 | ASIA    |
| <i>Crocidura musseri</i>       | Ruedi and Vogel, 1995                 |   | ASIA    |
| <i>Crocidura ramona</i>        | Ivanitskaya, Shenbrot and Nevo, 1996  | 1 | ASIA    |
| <i>Crocidura zaitsevi</i>      | Jenkins et al., 2007                  | 1 | ASIA    |
| <i>Cryptotis brachyonyx</i>    | Woodman, 2003                         | 1 | AMERICA |
| <i>Cryptotis colombiana</i>    | Woodman and Timm, 1993                | 1 | AMERICA |
| <i>Cryptotis peruviansis</i>   | Vivar, Pacheco and Valqui, 1997       | 1 | AMERICA |
| <i>Cryptotis tamensis</i>      | Woodman, 2002                         | 1 | AMERICA |
| <i>Myosorex kihalei</i>        | Stanley and Hutterer, 2000            | 1 | AFRICA  |
| <i>Notiosorex cockrumi</i>     | Baker, O'Neill and Mc Alilely, 2003   |   | AMERICA |
| <i>Notiosorex villai</i>       | Carraway and Timm, 2000               | 1 | AMERICA |
| <i>Sorex arunchi</i>           | Lapini and Testone, 1998              | 1 | ASIA    |
| <i>Sorex yukonicus</i>         | Dokuchaev, 1997                       | 1 | AMERICA |
| <i>Sylvisorex konganensis</i>  | Ray and Hutterer, 1996                |   | AFRICA  |
| <i>Sylvisorex pluvialis</i>    | Hutterer and Schlitter, 1996          | 1 | AFRICA  |
| <b>Family Talpidae</b>         |                                       |   |         |
| <i>Mogera kanoana</i>          | Kawada et al., 2007                   | 1 | ASIA    |
|                                |                                       |   |         |

## II. Methods

### 1. Acknowledgements

The following colleagues provided information, comments on the maps, or references. We indicate their institution and the group of mammals or continent from where they provided information.

Robert P. Anderson (American Museum Natural History)  
Joaquin Arroyo (National Anthropology Museum Mexico).  
Gabor Csorba (Hungarian Natural History Museum).  
Judith Eger (Royal Ontario Museum).  
Louise Emmons (Smithsonian Institution).  
T. F. Flannery (Australian Museum).  
P. Gaubert (Museum National d'Historie Naturelle).  
S. M. Goodman (Field Museum Natural History Chicago).  
L. Grajon (Museum National d'Historie Naturelle).  
Collin P. Groves (Australian National University).  
Lawrence R. Heaney (Field Museum Natural History Chicago).  
M. E. Holden (rodents, Africa).  
Robert Hoffman (American Museum Natural History)  
Rainier Hutteter (Museum Alexander Koenig).  
Paula Jentkins (British Museum of Natural History).  
H. Kefelioglu (Turkey).  
D. J. Kitchener (Western Australian Museum).  
Michael A. Mares (Oklahoma Museum Natural History).  
Guy G. Musser (American Museum Natural History).  
Manuel Ruedi (Institute of Zoologie Lausanne).  
Victor Pacheco (Museo de Historia Natural Lima).  
James L. Patton (University of California Berkeley)  
Victor Van Cakenberghe (University of Antwerps).  
Walter Vaerheyen (Institut Royal Sciences Naturelles Belgique).  
Rob Voss (American Museum Natural History).

### 2. Taxonomic information

To determine the list of new species of mammals we first compared the work of Wilson and Reeder (1993, 2005), following the nomenclature of the latter. After we completed the first draft of the manuscript a list of species of mammals recently described was published by Reeder et al. (2007). We compared our list and supplemented it with information from that study; our list contains, however, several species overlooked by them.

### 3. Mapping information

The data set contains geographic ranges for 407 species of terrestrial mammals of the world. We did not map marine species. We digitized the maps with geographic reference points in the source reference directly from the original projection and then we transformed them to a geographical projection in decimal degrees. We employed a geographic information system, including Arc View shape files for each species, to do the spatially-explicit analysis. The files contain the known geographic range depicted either as a boundary map, also known as the extent of occurrence (Gaston, 2003).

The sources of the maps for each species are identified in the Excel file. The references are the following ones:

Aggundey, I. R., and D. A. Schlitter. 1986. Annotated checklist of the mammals of Kenya. 2. Insectivora and Macroscelidea. *Annals of Carnegie Museum*, 55:325-347.

Aimi, M. and A., Bakar. 1992. Taxonomy and distribution of *Presbytis melalophos* group in Sumatra, Indonesia. *Primates* 33: 191-206.

Alberico, M. 1990. A new species of pocket gopher (Rodentia: Geomyidae) from South America and

- its biogeographic significance. Pp. 103-111, in *Vertebrates in the tropics* (Peters, G y R. Hutterer, eds.). Museum Alexander Koenig, Bonn, Alemania.
- Albuja V., L., and B.D. Patterson. 1996. A new species of northern shrew-opossum (Paucituberculata: Caenolestidae) from the Cordillera del Cóndor, Ecuador. *Journal of Mammalogy* 77:41-53.
- Alguja, L. V. and A. L. Gardner. 2005. A new species of *Lonchophylla* Thomas (Chiroptera: Phyllostomidae) from Ecuador. *Proceedings of the Biological society of Washington* 118(2):442-449.
- Alfred, J. R. B., N. K. Sinha and S. Chakraborty. 2002. Checklist of Mammals of India. *Records of the Zoological Survey of India, Occasional Paper* 199: 1-229.
- Amato, G., M. G. Egan and A. Rabinowitz. 1999. New species of muntjac, *Muntiacus putaoensis* (Artiodactyla: Cervidae) From Northern Myanmar. *Animal Conservation* 2: 1-7.
- Ambrose, L. 2003. Three acoustic forms of Allen's galagos (Primates; Galagonidae) in the Central African region. *Primates* 44: 25 –39.
- Anderson, R. P. and Handley, Ch. O. Jr. 2001. A new species of three-toed sloth (Mammalia: Xenarthra) from Panamá, with a review of the genus *Bradypus*. *Proceedings of the Biological Society of Washington* 144(1):1-33
- Anderson, P. R. 2003. Taxonomy, distribution, and natural history of the genus *Heteromys* (Rodentia: Heteromyidae) in Western Venezuela, with the description of a dwarf species from the peninsula de Paraguaná. *American Museum Novitates* 3396 3-43.
- Anderson, R.P. and P Jarrín. 2002. A new species of spiny pocket mouse (Heteromyidae, *Heteromys*) endemic to western Ecuador. *American Museum Novitates*, 3382.
- Anderson, R.P and Tim R.M. 2006. A new montane species of spiny pocket mouse (Rodentia: Heteromyidae: *Heteromys*) from northwestern Costa Rica. *American Museum Novitates*. 3509: 1 - 38.
- Andriaholinirina, N. 2006. Molecular phylogeny and taxonomic revision of the sportive lemurs (*Lepilemur*, Primates). *BMC Evolutionary Biology* 6 (17):1-13.
- Anderson, S. and T. L Yates 2000. A New genus and species of Phyllotine rodent from Bolivia. *Journal of Mammalogy* (8)1:188-36.
- Appleton, B. R., McKenzie and L. Christidis. 2004. Molecular systematics and biography of the bent-wing bat complex *Miniopterus schreibersii* (Kulh, 1817) (Chiroptera:Vespertilionidae). *Molecular Phylogenetics and Evolution* 31. 431-439.
- Arai, S., T. Mori, H. Yoshida, and S. Shiraishi. 1985. A note on the Japanese water shrew, *Chimarrogale himalayica platycephala*, from Kyushu. *Journal of the Mammalogical Society of Japan*, 10:193-203.
- Aulagnier, S. and M. Thevenot. 1987. Catalogue des mammiferes sauvages du Maroc. *Travaux de l'Institut Scientifique, Serie Zoologie*, 41:1-164.
- Auffray, J. C., A. Orth, J. Catalan, J-P. Gonzalez, E. Desmarais and F. Bonhomme. 2003. Phylogenetic position and Description of a new species of subgenus *Mus* (Rodentia, Mammalia) from Thailand. *Zoologica Scripta*, 32 (2): 119-127.
- Averianov, A. O., A. V. Abramov, and A. N. Tikhonov. 2000. A new species of *Nesolagus* (Lagomorpha: Leporidae) from Vietnam, with osteological description. *Contributions from the Zoological Institute St Petesburg*, 3:1-22.
- Azzarolipuncetti, M. L., M. Corti, A. Scazani, M. V. Civitelli and E. Capanna. 1996. Kayotypes of

- two endemic species of hare from Ethiopia. *Lepus habessinicus* and *L. starcki* (Lagomorpha, Leporidae). A comparison with *L. europaeus*. *Mammalia* 60: 223-230.
- Baker, R.J.; S. Solari and F. G. Hoffmann. 2002. A new Central American species from the *Carollia brevicauda* complex. *Occasional papers, Museum of Texas Tech University* 217:1-12.
- Baker, R. J., R. M. Fonseca, D. A. Parish, C. J. Phillips and F. G. Hoffmann. 2004. New bat of the genus *Lophostoma* (Phyllostomidae: Phyllostominae) from northwestern Ecuador. *Occasional Papers of Museum of Texas Tech University* 232:3-20.
- Banack, S.A. 2001. Mammalian Species *Pteropus samoensis*. the American Society of Mammalogists. 661: 1-4.
- Balete, D.S., Rickart E.A., Rosell-Amba L.R.G.B., Jansa S. and L.R. Heaney. 2007. Descriptions of two new species of *Rhynchomys* Thomas (Rodentia: Muridae: Murinae) from Luzon Island, Philippines. *Journal of Mammalogy*, 88:287-301.
- Barry, R. E. and J. Shoshani. 2000. *Heterohyrax brucei*. *Mammalian Species*, 645:1-7.
- Barome, P.O.; M. Monnerot and J. C. Gautun, 2000. Phylogeny of the genus *Acomys* (Rodentia, Muridae) based on the cytochrome B mitochondrial gene: implications on taxonomy and phylogeography. *Mammalia* 64: 423-438.
- Bates, P. J.J. 1985. Studies of gerbils of genus *Tatera*: The specific distinction of *Tatera robusta* (Cratzschmar, 1826), *Tatera nigricauda* (Peters, 1878) and *Tatera phillipsi* (De winton, 1898). *Mammalia* 49: 37-52.
- Bates, P. J. J. 1994. The distribution of *Acomys* (Rodentia: Muridae) in Africa and Asia. *Israel Journal of Zoology* 40:199-214.
- Bates, P. J.J. and D. L. Harrison. 1997. *Bats of the Indian subcontinent*. Harrison Zoological Museum Publication, Kent, UK.
- Bates, J. J. P., M. J. Struebig, S. J. Rossiter, T. Kingston, S. S. Lin OO and K. Mya Mya. 2004. A new species of *Kerivoula* (Chiroptera: Vespertilionidae) from Myanmar (Burma). *Acta Chiropterologica* 6(2): 219-226.
- Bearder, S.1998. *Pseudopotto*: When is a potto not a potto? *African Primates* 3(1-2): 43-44.
- Beasley, I., Robertson K.M. and P. Arnoldc.2005. Description of a new dolphin, the australian snubfin dolphin *Orcaella heinsohni* sp. n. (Cetacea, Delphinidae). *Marine Mammal Science*, 21: 365-400
- Bennett, D., K. Hampson, S. Walker, T Clements, and P. Alviola. 2002. *Further studies on the chiropteran fauna of the Polillos island. Report, Fauna and Flora Preservation Society*, London.
- Bennet, N. C. and Faulkes, G. Ch. 2000. African mole-rats: Ecology and Eusociality. Cambridge University, U. K.
- Beckman, M. 2005. Biologist find new species of African Monkey. *Science* 308: 1103
- Bergmans, W. 2001. Notes on distribution and taxonomy of Australasiam bats I. Pteropodinae and Nyctimeninae (Mammalia, Megachiroptera, Pteropodidae). *Bulletin Zoological Museum University of Amsterdam* 51(8): 119-152.
- Bonvicino, C. and F. C. Almeida. 2000. Karyotype, morphology and taxonomic status of *Calomys expulsus* (Rodentia: Sigmodontinae). *Mammalia* 64 (3): 339-351.
- Bonvicino CR, M. Weksler 1998. A new species of *Oligoryzomys* (Rodentia, Sigmodontinae) from northeastern and central Brazil. *Z. sauetierkunde* 63(2): 90-103

- Bonvivino, C. R. 2003 A new species of *Oryzomys* (Rodentia, Sigmodontinae) of the *subflavus* group from the Cerrado of Central Brazil. *Mammalian Biology* 68 (2):78-90.
- Borodin, A. V. And N. V. Ivakina. 2000. Taxonomic status of voles of the genus *Allophaiomys* (Arvicolinae, Rodentia) from the South Ural region. *Z. saugetierkunde* 79: 1465-1475.
- Borodin, A.M., A.G.Bannikov, and V.E.Sokolov (eds.) 1984. *USSR Red Data Book*, 2d ed. Forest Industry Press, Moscow. (in Russian).
- Bouchard, S. 2001. Mammalian Species *Chaerephon Ansorgei*. The American Society of Mammalogists. 660: 1-3.
- Bandon-Jones, D. 1996 The asian Colobinae (Mammalia: Cercopithecidae) as indicators of Quaternary climatic change. *Biological Journal of the Linnean Society* 59 327-350-
- Bradley, D. R., D. S. Carroll, M. L. Haynie, R. Muñiz- Martinez, M. J. Hamilton and W. Kilpatrick. 2004 A new species of *Peromyscus* from western Mexico. *Journal of Mammalogy* 85: 1184-1193.
- Braun, J. K. and Michael A. Mares. 2002. Systematic of the *Abrocoma cinerea* species complex (Rodentia: Abrocomidae), with a description of a new species of *Abrocoma*. *Journal of Mammalogy*: 83: 1-19.
- Braun, J. K., Mares. M.A. and R. A. Ojeda, 2000. A new species of grass mouse, genus *Akodon* (Muridae:Sigmodontidae), from Mendoza Province, Argentina. *Z. Saugetierkunde* 65: 216-225.
- Braun, J. K., and M. A. Mares. 1995, A new genus and species of phyllotine rodent (Rodentia: Muridae: Sigmodontinae: Phyllotini): *Journal of Mammalogy*: 76 504-521.
- Braun, K. J., R. A. Van den Bussche, P. K. Morton and M. A. Mares. 2005. Phylogenetic and biogeographic relationships of mouse opossums *Thylamys* (Didelphimorphia, Didelphidae) in southern south America. *Journal of Mammalogy* 86: 147-159.
- Bronner, G. N. 2000. New species and subspecies of Golden Mole (Chrysochloridae: *Amblysomus*) from Mpumalanga, South Africa. *Mammalia* 64: 41-54.
- Brooks, D. M., R. J. Baker, R. J. Vargas, T. Tarifa, H. Aranibar and J. M. Rojas. 2004. A new species of *Oryzomys* (Rodentia: Muridae) from an Isolated pocket of Cerrado in eastern Bolivia. *Occasional Papers of Museum of Texas Tech University*. 241:1-12.
- Brunner, S. 2004. Fur seals and sea lions (Otariidae): identification of species and taxonomic review. *Systematics and Biodiversity* 1(3): 339-439.
- Burda H, Zima J, Scharff A, et al. 1999. The karyotypes of *Cryptomys anselli* sp nova and *Cryptomys kafuensis* sp nova: new species of the common mole-rat from Zambia (Rodentia, Bathyergidae). *Z. saugetierkunde* 64: 36-50.
- Caballero, S., F Trujillo, J. A. Vianna, and H. Barrios. 2007. Taxonomic status of the genus *sotalia*: species level ranking for "tucuxi" (*Sotalia fluviatilis*) and "costero" (*Sotalia guianensis*) dolphins. *Marine Mammal Science*, 23: 358-386
- Capanna, E.; E. Bekele; M. Capula ; R. Castiglia; M. V. Vivitelli; J. T. Cl. Codjia; M. Corti and C. Fadda. 1996. A multidisciplinary approach to the systematics of the genus *Arvicanthis* Lesson, 1842 (Rodentia, Murinae) *Mammalia* 60: 677-696.
- Carleton, M. D. 1994. Systematic Studies of madagascar ´s Endemic Rodents (Muroidea: Nesomyinae): Revision of the genus *Eliurus*. *American Museum Novitates* 3057:1-55.
- Carleton, M. D. 2005. Family Cricetidae. In: *Mammals of the World: A taxonomic and Geographic Reference* (D. E. Wilson and D. M. Reeder, eds). Third Edition. Smithsonian Institution Press, Washington D.C.
- Carleton, M. D., and C. Martinez. 1991. Morphometric differentiation among West African populations of the rodent genus *Dasymys* (Muroidea: Murinae), and its taxonomic

- implications. *Proceedings of the Biological Society of Washington*, 104:419-435.
- Carleton, M. D., and E. Van der Straeten. 1997. Morphological differentiation among Sub-Saharan and North African populations of the *Lemniscomys barbarus* complex (Rodentia: Muridae). *Proceedings of the Biological Society of Washington*. 110: 640-680.
- Carleton, M. D., and S. L. Olson. 1999. Amerigo Vespucci and the rat of Fernando de Noronha: a new genus and species of Rodentia (Muridae: Sigmodontinae) from a volcanic island off Brazil's continental shelf. *American Museum Novitates*, 3256:1-59.
- Carleton, D. M. and W. T. Stanley. 2005. Review of the *Hylomyscus denniae* complex (Rodentia: Muridae) in Tanzania, with a description of a new species. *Proceedings of the Biological Society of Washington* 118: 619-646.
- Carleton, M. D., and S. M. Goodman. 1998. New taxa of nesomyine rodents (Muroidea: Muridae) from Madagascar's northern highlands, with taxonomic comments on previously described forms. *Fieldiana Zoology, New Series*, 139:161-198.
- Carleton, M. D., R. D. Fisher, and A. L. Gardner. 1999. Identification and distribution of Cotton Rats, genus *Sigmodon* (Muridae: Sigmodontinae), of Nayarit, Mexico. *Proceedings of the Biological Society of Washington*, 112:813-856.
- Carleton, M. D., S. M. Goodman, and D. Rakotondravony. 2001. A new species of tufted-tailed rat, genus *Eliurus* (Muridae: Nesomyinae), from western Madagascar, with notes on the distribution of *E. myoxinus*. *Proceedings of the Biological Society of Washington*, 114:972-987.
- Carleton, M. D., and S. M. Goodman. 2007. A New Species of the *Eliurus majori* Complex (Rodentia: Muroidea: Nesomyidae) from South-central Madagascar, with Remarks on Emergent Species Groupings in the Genus *Eliurus*. *American Museum Novitates*, 3547: 1 - 21.
- Carraway, N. L. 2000. Revision of the extant taxa of the genus *Notiosorex* (Mammalia: Insectivora: Soricidae). *Proceedings of the Biological Society of Washington*, 113: 302-318.
- Castro, A. I. 1997 *Patrones de Distribución Geográfica en los Mamíferos Terrestres de África*. Tesis de Licenciatura en Biología. Facultad de Ciencias, Universidad Nacional Autónoma de México. DF, México.
- Castro-Campillo, A. and J. Ramirez-Pulido. 2000. Systematics of the smooth-toothed pocked gopher, *Thomomys umbrinus*, in the Mexican Transvolcanic Belt. *American Museum Novitates* 3297. 1-37.
- Ceballos, G. 2004. *Mamíferos del mundo*. Conabio, México D.F.
- Ceballos, G. and G. Oliva (Eds). 2005. *Mamíferos silvestres de México*. CONABIO-FCE, México D.F.
- Chapman, J. A. and J. E. C. Flux (eds.). 1990. *Rabbits, hares and pikas*. IUCN, Gland, Switzerland.
- Chapman, J. A. Cramer, K. L. Dippenaar, N. J. And T. J. Robinson. 1992. Systematics and Biogeography of the new england cottontail, *Sylvilagus transitionalis* (Bangs, 1895), with the descriptions of a new species from the Appalachian Mountains. *Proceedings of the biological Society of Washington* 105: 841-866.
- Chimimba, C. T. and D. J. Kitchener. 1991. A systematic revision of Australian Emballonuridae (Mammalia: Chiroptera). *Records of the Western Australian Museum* 15: 203-266.
- Chimimba, C.T. 1998. A taxonomic synthesis of southern African *Aethomys* (Rodentia: Muridae) with a key to species. *Mammalia* 62: 427-437.
- Christoff, A. U., V. Fagundes, I. Sbalqueiro, M. Mattevi, and Y. Yonenaga-Yassuda. 2000.

- Description of a new species of *Akodon* (Rodentia, Sigmodontidae) from southern Brazil. *Journal of Mammalogy* 81: 838–851.
- Colak, E. E. Kinvanc and N. Yigit. 1994. A study on taxonomic status of *Allactaga euphratica* Thomas, 1881 and *Allactaga williamsi* Thomas, 1897 (Rodentia: Dipodidae) in Turkey. *Mammalia* 58: 591-600.
- Colyn, M. 1991. L'importance zoogéographique du bassin du fleuve Zaïre pour la spéciation: Le cas des Primates Simiens. Koninklijk Museum voor Midden-Afrika, Tervuren, Belgique *Annalen. Zoologische Wetenschappen* 264: i-ix, 1-250.
- Corbet, G. B. 1978. *The mammals of the Palaearctic region: a taxonomic review*. Cornell University Press. London, U.K.
- Corbet, G. B., and J. E. Hill. 1992. *The Mammals of the Indomalayan Region: A systematic review*. Oxford: Oxford University Press
- Colleen, M. I., H. Burda, and R. L. Honeycutt. 2003. Molecular phylogenetics and taxonomy of the African mole-rats, genus *Cryptomys* and the new genus *Coetomys* Gray, 1864. *Molecular Phylogenetics and Evolution* 31 997-1014.
- Cotterill, F. P. D. 2003. Insights into the taxonomy of tsessebe antelopes *Damaliscus lunatus* (Bovidae: Alcelaphini), in south-central Africa: With the description of a new evolutionary species. *Durban Museum Novitates*, 28:45-55.
- Cotterill, F.T.D. 2002. A new species of horse-bat (microchiroptera: Rhinolophidae) from South-central Africa: with comments its affinities and evolution, and the characterization of rhinolophid species. *Journal Zoologist London* 256: 165-179.
- Csorba G. 1997. Description of a new species of *Rhinolophus* (Chiroptera: Rhinolophidae) from Malaysia. *Journal of Mammalogy* 78: 342-347.
- Csorba, G., and LL. Lee. 1999. A new species of vespertilionid bat from Taiwan and a revision of the taxonomic status of *Arielulus* and *Thainycteris* (Chiroptera: Vespertilionidae). *Journal of Zoology* 248: 361-367.
- Csorba, G. and P.J.J. Bates 2005. Description of a new species of *Murina* from Cambodia (Chiroptera: Vespertilionidae: Murininae) *Acta Chiropterologica* 7: 1-7.
- Cuartas, C. A., J. Muñoz y M- González. 2001. Una nueva especie de *Carollia* Gray 1838 (Chiroptera: Phyllostomidae) de Colombia. *Actual Biology* 23: 63-73.
- Cuartas-Calle A., J. Muñoz. 1999. First record of *Sturnira thomasi* de la torre and Schwarts, 1966 (Chiroptera: Phyllostomidae) from Colombian. *Actual Biology* 21: 173-180.
- Corti, M. Di Guiliomaria and W. Verheyen. 2000. Three-Dimensional geometric morphometrics of the African Genus *Lophuromys* (Rodentia: Muridae) *Hystrix* 11: 145-154.
- Cucchi, T. et al. 2006. A new endemic species of the subgenus *Mus* (Rodentia, Mammalia) on the Island of Cyprus. *Magnolia Press. Zootaxa* 1241: 1–36.
- Da Silva M.N.F. 1998. Four new species of spiny rats of the genus *Proechimys* (Rodentia : Echimyidae) from the western Amazon of Brazil. *Proceedings of the biological Society of Washington* 111: 436-471.
- Dalebout, M.L., Mead J.G., Baker C.S., Baker A.N. and Van Helden A.L. 2002. A new species of beaked whale *Mesoplodon perrini* sp. n. (cetacea: ziphiidae) discovered through phylogenetic analyses of mitochondrial DNA sequences. *Marine Mammal Science*, 18: 577–608.
- Datta, A., Pansa J., Madhusudan M.D. and Mishra C. 2003. Discovery of the leaf deer *Muntiacus putaoensis* in Arunachal Pradesh: An addition to the large mammals of India. *Current Science*: 454-458.



- Davison, A., Birks J.D.S., Griffiths H.I., Kitchener A.C., Biggins D. and Butlin R.K. 1999. Hybridization and the phylogenetic relationship between polecats and domestic ferrets in Britain. *Biological Conservation* 87: 155-161.
- De Freitas T.R.O. 2001. Tuco-tucos (Rodentia, octodontidae) in Southern Brazil: *Ctenomys lami* spec. nov separated from *C.minutus*. *Studies Neotropical Fauna* 36: 1-8.
- D'Elía, G. and U. F. J. Pardiñas. 2004. Systematics of Argentinean, Paraguayan, and Uruguayan swamp rats of the genus *Scapteromys* (Rodentia, Cricetidae, Sigmodontidae). *Journal of Mammalogy* 85: 897-910.
- De Silva M.J, Y. Yonenaga-Yassuda. 1998. Karyotype and chromosomal polymorphism of an undescribed *Akodon* from Central Brazil, a species with the lowest known diploid chromosome number in rodents. *Cytogenetics, cell genet* 81: 46-50.
- D'Huart, J.P. 1993. The Forest Hog (*Hylochoerus meinertzhageni*). Pp. 84 – 93, in: *Pigs, Peccaries and Hippos: Status Survey and Action Plan* (W. L. R. Oliver, ed). IUCN, Gland, Switzerland.
- Díaz, M. M., R. M. Barquez, J. K. Braun, and M. A. Mares. 1999, A new species of *Akodon* (Muridae: Sigmodontinae) from northwestern Argentina. *Journal of Mammalogy* 80: 786–798.
- Díaz, M. M., D. A. Flores and R. M. Barquez. 2002. A new species of gracile mouse opossum, genus *Gracilinanus* (Didelphimorphia:Didelphidae), from Argentina. *Journal of Mammalogy* 83:824-833.
- Dickman C.R., Parnaby, H.E. Crowther M.S. 1998. *Antechinus agilis* (Marsupialia : Dasyuridae), a new species from the *A.stuartii* complex in south-eastern Australia. *Australian Journal of Zoology* 46: 1-26.
- Dieterlen, F. 1987. Neue erkenntnisse uber afrikanische burstenhaarmause, gattung *Lophuromys* (Muridae; Rodentia). *Bonner Zoologische Beitrage* 38:183-194.
- Dieterlen, F., and H. Heim de Balsac. 1979. Zur gkologie und taxonomie der Spitzm use (Soricidae) des Kivu-Gebietes. *Saugetierkundliche Mitteilungen*, 27:241-287.
- Dippenaar, N. J. 1980. New species of *Crociodura* from Ethiopia and northern Tanzania (Mammalia: Soricidae). *Annals of the Transvaal Museum*, 32:125-154.
- Dippenaar, N. J., and J. A. J. Meester. 1989. Revision of the *C. luna-fumosa* complex of Afrotropical *Crociodura* Wagler, 1832 (Mammalia: Soricidae). *Annals of the Transvaal Museum*, 35:1-47.
- Dokuchaev NE. 1997. A new species of shrew (Soricidae, Insectivora) from Alaska. *Journal of Mammalogy*, 78: 811-817.
- Dung V. V., PH. M. Giao, N. N.Chinh, D. Tuoc, P. Arctander and J. MacKinnon. 1993. A new species of living bovid from Vietnam. *Nature*, 63: 443-445.
- Dowler, C. R., D. S. Carroll and C. W. Edwards. 2000. Rediscovery of rodents (Genus *Nesoryzomys*) considered extinct in the Galápagos islands. *Oryx* 34: 109-117.
- Durant P, Guevara MA. 2001. A new rabbit species (*Sylvilagus*, Mammalia : Leporidae) from the lowlands of Venezuela. *Revista Biología Tropical* (1): 369-381.
- Duarte, J. M. B, and W. Jorge. 2003. Morphologic and cytogenic description of the small red brocket (*Mazama bororo* Duarte, 1996) in Brazil. *Mammalia*, 67:403-410.
- Eger J.L. and M. M.Theberge. 1999. *Thainycteris aureocollaris* (Chiroptera, Vespertilionidae) in Vietnam. *Mammalia* 63: 237-240.
- Eger., J. L., and D. A. Schlitter. 2001. New species of *Glauconycteris* from West Africa (Chiroptera: Vespertilionidae) *Acta Chiropterologica*, 3: 1-10.
- Eldridge, M. D. B. and R. L. Close. 1992. Taxonomy of Rock Wallabies, *Petrogale* (Marsupialia: Macropodidae). I. A Revision of the Eastern *Petrogale* with the Description of Three New

Species. *Australian Journal of Zoology*, 40: 605-625.

- Ellerman, J. R., and T. C. S. Morrison-Scott. 1951. *Checklist of Palaearctic and Indian mammals 1758 to 1946*. Trustees of the British Museum (Natural History), London.
- Emmons, L. H. 1993. A new genus and species of rat from Borneo (Rodentia: Muridae). *Proceedings of the biological Society of Washington*, 106:752-761.
- Emmons, L. H. 1999. A new genus and species of abrocomid rodent from Peru (Rodentia: Abrocomidae): *American Museum Novitates*. 3279 1–14.
- Emmons, L. H. 1999. Two new species of *Juscelinomys* (Rodentia: Muridae) from Bolivia. *American Museum Novitates* 3280:1-15.
- Emmons, L. H. et al. 2002. A review of the named forms of *Phyllomys* (Rodentia, Echimyidae), with the description of a new species from coastal Brazil. *American Museum Novitates* 3380 1-40.
- Emmons, L. H., and M. Guiomar Vucetich. 1998. The identity of Winge's *Lasiuromys villosus* and the description of a new genus of echimyid rodent (Rodentia: Echimyidae). *American Museum Novitates*, 3223: 1 -22.
- Emmons, L.H. and J. L. Patton. 2005. A New Species of *Oryzomys* (Rodentia: Muridae) from Eastern Bolivia. *American Museum Novitates*. 3478: 1- 26.
- Engstrom, D. M. Sánchez-Herrera, O. And G. Urbano-Vidales. 1992. Distribution, geographic variation, and systematic relationships within *Nelsonia* (Rodentia: Sigmodontinae). *Proceedings of the Biological Society of Washington* 106: 867-881.
- Escarguel G. 1998. *Protadelomys maximini* nov. sp. (Rodentia, Mammalia): contribution to the knowledge of the genus *Protadelomys* and biochronological implications. *Geobios-Lyon* 31: 371-383 1998
- Esselstyn, J.A. 2007. A new species of stripe-faced fruit bat (Chiroptera: Pteropodidae: *Styloctenium*) from the Philippines. *Journal of Mammalogy*, 88:951–958.
- Fadda, C., R. Castiglia, P. Colangelo, M. Corti, R. Machang´u, R. Mkundi, A. Scazani, P. Tesha, W. Verheyen and E. Capanna. 2001. The rodent fauna of Tanzania: a cytotoxic report from the Maasai Steppe (1999). *Rend. Fis. Acc. Lincei*.9: 29-49.
- Fagundes, V., Y. Sato, M. J. Silva, F. Rodrigues, Y. Yonenaga-Yassuda. 2000. A new species of *Calomys* (Rodentia, Sigmodontinae) from Central Brazil identified by its karyotype. *Hereditas*, 133:195-200.
- Fahr, J. Vierhaus, H. Hutterer, R. Kock, D. 2002. A revision of the *Rhinolophus maclaudi* species group with the description of a new species from west Africa (Chiroptera: Rhinolophidae). *Myotis* 40:95-126.
- Faulkes, C. G., Verheyen, E. Verheyen, W. Jarviss, M.U. and Bennett, C. 2004. Phylogeographical patterns of genetic divergence and speciation in Africa mole-rats (Family: Bathyergidae). *Molecular Ecology* 13: 613-629.
- Fenton, M. B. and Eger J. L. 2002. *Chaerephon chapini*. *Mammalian Species* 692: 1–2.
- Ferrari, S. F. y M. A. Lopes. 1992. A new species of marmoset, genus *Callithrix* Erxleben, 1777 (Callitrichidae, Primates), from western Brazilian Amazonia. *Goeldiana, Zoologia*, 12:1-13.
- Flannery, T. F. 1992. Taxonomic revision of the *Thylogale brunii* complex (Macropodidae: Marsupialia) in Melanesia, with description of a new species. *Australian Mammalogy* 15: 7-23.
- Flannery, T. F. 1994. Systematic revision of *Emballonura furax* Thomas, 1911 and *E. dianae* Hill, 1956 (Chiroptera, Emballonuriade) with description of new species and subspecies. *Mammalia* 58: 601-612.

- Flannery, T. F. 1995a. *Mammals of the South-West Pacific and Moluccan Islands*. Cornell University Press, New York.
- Flannery, T. F. 1995b. *Mammals of New Guinea*. Cornell University Press, New York.
- Flannery, T. F. and Boeadi, 1995. Systematic revision within the *Phalanger ornatus* complex, with description of a new species. *Australian Mammalogy*, 18: 35-44.
- Flannery, T.F. and C.P. Groves, 1998. A revision of the genus *Zaglossus*, with description of a new species and subspecies. *Mammalia* 62: 367-396.
- Flannery, T.F., Boeadi and A. L. Szalay. 1995. A new Tree-kangaroo from Irian Jaya, Indonesia, with notes on ethnography and the evolution of Tree-kangaroos. *Mammalia* 59: 65-84.
- Flux, J. E. C., and R. Angermann. 1990. The hares and jackrabbits. Pp. 61-94, in: *Rabbits, hares and pikas* (J. A. Chapman and J. E. C. Flux, eds.). IUCN., Gland, Switzerland.
- Fleck, W. D. , R. S. Voss and N. S. Simmons. Underdifferentiated taxa and sublexical categorization: an example from marts classification of bats. *Journal of Ethnobiology* 22: 61-102.
- Fooden, J. 1991. Systematic review of Philippine macaques (Primates, Cercopithecidae: *Macaca fascicularis* subsp.). *Fieldiana: Zoology*, series 64: 1-44.
- Fooden, J. 1995. Systematic review of Southeast Asian longtail macaques, *Macaca fascicularis* (Raffles, [1821]). *Fieldiana: Zoology*, new series 81: 1-206.
- Foose, T. J., and N. van Strien [editors]. 1997. Asian Rhinos - Status Survey and Conservation Action Plan. Gland, Switzerland, and Cambridge, UK: IUCN. Available online at <http://www.rhinos-irf.org/technicalprograms/asrsg/index.htm>
- Fonseca, R. M. and M. Pinto. 2004. A new *Lophostoma* (Chiroptera: Phyllostomidae: Phyllostominae) from the Amazonia of Ecuador. *Occasional Papers of Museum of Texas Tech University* 242 1-12.
- Francis C. M. and J.E. Hill. 1998. New records and a new species of *Myotis* (Chiroptera, Vespertilionidae) from Malaysia. *Mammalia* 62: 241 – 262.
- Francis, Ch., D. Kock, D. and J. Habersetzer. 1999. Sibling species of *Hipposideros ridleyi* (Mammalia: Chiroptera: Hipposideridae). *Senckenbergiana Biologica*, 79: 255-270.
- Francis, Ch. M. 1989. Notes on fruit bats (Chiroptera, Pteropodidae) from Malaysia and Brunei, with the description of a new subspecies of *Magaerops wetmorei* Taylor, 1934. *Canadian Journal Zoology* 67:2878-2882.
- Fuentes, A. and Olson, M. 1995. Preliminary observations and status of the Pagai macaque. *Asian Primates* 4(4): 1-4.
- Garbutt, N. 1999. *Mammals of Madagascar*. Pica Press, U.K.
- Gardner, A. L. and M. Romo. 1993. A new *Thomasomys* (Mammalia: Rodentia) from the Peruvian Andes. *Proceedings of the biological Society of Washington* 106: 762-774.
- Gaubert, P., G.Veron, and M. Tranier. 2002: Genets and "genet-like" taxa (Carnivora, Viverrinae): phylogenetic analysis, systematics and biogeographic implications. *Zoological Journal of the Linnean Society*,134: 317-334.
- Gaubert, P., G.Veron, , M.Colyn, , A.Dunham, and S.Shultz, 2002. A reassessment of the distribution of the rare *Genetta janhstoni* (Viverridae, Carnivora) with some newly discovered specimens. *Mammal Review*, 32: 132-144.
- Gaubert, P. 2003. Description of a new species of genet (Carnivora; Viverridae; genus *Genetta*) and taxonomic revision of forest forms related to the large-spotted genet complex. *Mammalia* 67:

- Geissmann, T. 1994. Systematik der Gibbons. *Seischrift des Kolner Zoo* 37: 65–77.
- Geissmann, T. 1995. Gibbon systematics and species identification. *International Zoo News* 42: 467–501.
- Ghose, R. K. 1965. A new species of mongoose (Mammalia:Carnivora:Viverridae) from West Bengal, India. *Proceedings of the Zoological Society, Calcuta*, 18:173-178.
- Giao, P.M., D. Tuoc, V. V. Dung, E. D. Wikramanayake, G. Amato, P. Arctander, and J. R. MacKinnon. 1998. Description of *Muntiacus truongsongensis*, a new species of muntjac (Artyodactyla, Muntiacidae) from Central Vietnam and its implications for conservation. *Animal Conservation*, 1: 61-68.
- Glanz, E. W. and S. Anderson. 1990. Notes on Bolivian Mammals 7 A New species of *Abracoma* (Rodentia) and relationships of the Abrocomidae. *American Museum Novitates* 2991:1-32.
- Glover M. A.1940. *The Mammals of China and Mongolia*. The American Museum of Natural History, New York.
- Goodman, S. M. 2004. A new species of *Chaerephon* (Molossidae) from Madagascar with notes on other members of the family. *Acta Chiropterologica*, 6: 227-248.
- Goodman, S. M., and P. D. Jenkins. 1998. The insectivores of the Réserve Spéciale d'Anjanharibe-Sud, Madagascar. Pp 139-161, in: A floral and faunal inventory of the eastern slopes of the Réserve Spéciale d'Anjanharibe-Sud, Madagascar: with reference to elevational variation. (S.M. Goodman, ed.). *Fieldiana:Zoology*, n. s. 90: 1 - 246.
- Goodman, S. M. and S. G. Cardiff. 2004. A new species of *Chaerephon* (Molossidae) from Madagascar with notes on other members of the family. *Acta Chiropterologica*, 6: 227–248.
- Goodman, S. M. and V. Soarimalala. 2005. A new species of *Macrotarsomys* (Rodentia: Muridae: Nesomyinae) from Southwestern Madagascar. *Proceedings of the Biological Society of Washington* 118: 450-464.
- Goodman, S. M., Jenkins R.K.B and Ratrimomanarivo F. H.. 2005. A review of the genus *Scotophilus* (Mammalia, Chiroptera, Vespertilionidae) on Madagascar, with the description of a new species. *Zoosystema* 27: 867-882.
- Goodman, S. M., Ratrimomanarivo, F. H., Randrianandrianina, F. H. 2006. A new species of *Scotophilus* (Chiroptera: Vespertilionidae) from western Madagascar. *Acta Chiropterologica*, 8: 21-37.
- Goodman, S.M, F. Rakotondraparany, and A. Kofoky. 2007. The description of a new species of *Myzopoda* (Myzopodidae: Chiroptera) from western Madagascar. *Mammalian Biology*, 72: 65-81.
- Goodman, S.M., D. Rakotondravony, H. N. Randriamanantsoa and M. Rakotomalala-Razanahoera. 2005. A new species of rodent from the montane forest of central eastern Madagascar (Muridae: Nesomyinae: *Voalavo*). *Proceedings of the Biological Society of Washington* 118:863–873.
- Goodman, S. M., Cardiff S. G., Ranivo J., Russell A. I. and Yoder A. D. 2006. A New species of *Emballonura* (Chiroptera: Emballonuridae) from the Dry Regions of Madagascar. *American Museum Novitates*, 3538: 1 - 24.
- Goodman, S.M., C. J. Raxworthy, C.P. Maminirina and L. E. Olson. 2006. A new species of shrew tenrec (*Microgale jobihely*) from northern Madagascar. *The Zoological Society of London*. 270: 384–398.
- Gonzales, P.C., and R. S. Kennedy. 1996. A new species of *Crateromys* (Rodentia, Muridae) from Panay, Philippines. *Journal of Mammalogy*, 77: 25-40.

- Graphodatsky, A. S., O. V. Sablina, M. N. Meyer, V. G. Malikov, E. A. Isakova, V.A. Trifonov, A. V. Polyakov, T. P. Lushnikove, N. V. Vorobieva, N. A. Seryukova, P. L. Perelman; P. M. Borodin, P. Benda, D. Frynta, L. Leikepova, P. Munclinger, J. Piálek, J. Sádlová, and J. Zima. 2000 Comparative cytogenetics of hamsters of the genus *Calomyscus*. *Cytogenetic Cell Genet* 88:296-304.
- Granjon, L., V.M Aniskin, V. Volobouev, et al. 2002. Sand-dwellers in rocky habitats: a new species of *Gerbillus* (Mammalia : Rodentia) from Mali. *Journal of Zoology*, 256:181-190.
- Gregorin, R., A. D. Ditchfield. 2005. New genus and Species of nectar-feeding bat in the tribe Lonchophyllini (phyllostomidae: Glossophaginae) from northeastern Brazil. *Journal of Mammalogy* 86: 403-414.
- Gregorin, R., E. Goncalves, B. K. Lim, and M. D. Engstrom. 2006. new species of disk-winged bat *Thyroptera* and range extension for *T. Discifera*. *Journal of Mammalogy*, 87:238–246.
- Groves, C. P. 1997. A taxonomy of wild pigs (*Sus*) of the Philippines. *Zoological Journal of the Linnean Society* 120: 163-191.
- Groves, C. P. 1997-1998. *Pseudopotto martini*: A new potto? *African Primates* 3 (1-2): 42-43.
- Groves, C. P. 2000. The genus *Cheirogaleus*: unrecognized biodiversity in dwarf lemurs. *International Journal of Primatology*, 21: 943-962.
- Groves, C. P. 2001. *Primate Taxonomy*. Smithsonian Institution Press, Washington, DC.
- Groves, C. P. 2003. Taxonomy of ungulates of the Indian Subcontinent. *Journal of the Bombay Natural History Society*, 100: 341-361.
- Groves, P. C. and G. B. Shaller. 2000. The phylogeny and biogeography of the newly discovered annamite artiodactyls. Pp, 261 – 282, in: *Antelopes, Deer and Relatives fossil record, behavioural ecology, systematics and conservation*. (Vrba, E.S. and B. G. Shaller, eds). Yale University Press, New Haven.
- Groves, C.P. and Meijaard E. 2005. Interspecific variation in *Moschiola*, the Indian chevrotain. *The Raffles Bulletin of Zoology*,. Supplement No.12: 413–421.
- Grubb, P., T. M. Butynski, J. F. Oates, S. K. Bearder, T. R. Disotell, C. P. Groves, and T.T. Struhsaker. 2003. Assessment of the Diversity of African Primates. *International Journal of Primatology* 24: 1301 - 1357.
- Grubb, P. et al. 1998. *Mammals of Ghana, Sierra Leone and The Gambia*. Tendirine P., London.
- Gurung, K. K. and R. Singh, R. 1998. *Field guide to the mammals of the Indian subcontinent*. Academic Press, San Diego.
- Guerrero, J. A. De Luna, E. and González. 2004. Taxonomic status of *Artibeus jamaicensis triomylus* inferred from molecular and morphometric data. *Journal of Mammalogy* 85: 866-874.
- Guillén-Servent, A. and Francis, Charles M. 2006. A new species of bat of the *Hipposideros bicolor* group (Chiroptera: Hipposideridae) from Central Laos, with evidence of convergent evolution with Sundaic taxa. *Acta Chiropterologica*, 8: 39-61
- Hall, E. R. 1981. *The Mammals of North America*. John Wiley and Sons, New York. .
- Handley C.O. 1996. New species of mammals from northern South America: bats of the genera *Histiotus* Gervais and *Lasiurus* Gray (Chiroptera: Vespertilionidae). *Proceedings of the Biological Society of Washington* 109: 1-9.
- Handley, C. O., Jr. y R. H. Pine. 1992. A new species of prehensile-tailed porcupine, genus *Coendou* Lacépède, from Brazil. *Mammalia*, 56:237-244.
- Hafner, M. S., T. A. Spradling, J. E. Light, D. J. Hafner and J. R. Demboski. 2004. Systematic revision of Pocket gophers of the *Cratogeomys gymnurus* species group. *Journal of*

*Mammalogy* 85: 1170-1183.

- Happold, D. C. D. 1987. *The Mammals of Nigeria*. Clarendon Press, Oxford.
- Happold, M. 2005. A new species of *Myotis* (Chiroptera: Vespertilionidae) from central Africa. *Acta Chiropterologica*, 7: 9–21.
- Harrison, D. L. and P. J. J. Bates. 1991. *The mammals of Arabia*. 2<sup>ND</sup> edition. Harrison Zoological Museum Publication, Kent, UK.
- Heaney, L. R., D. S. Balete, L. Dolar, A. C. Alcalá, A. Dans, P. C. Gonzales, N. Ingle, M. Lepiten, W. L. R. Oliver, P. S. Ong, E. A. Rickart, B. R. Tabaranza, Jr., and R. C. B. Uzzurum, 1998 A synopsis of the mammalian fauna of the Philippine Islands. *Fieldiana: Zoology, n. s.*, 88:1-61.
- Heaney, L. R., Oliver, W., E. A. Rickart, B. R. Tabaranza, Jr., and R. C. B. Uzzurum. 1998. A synopsis of the mammalian fauna of the Philippine Islands. *Fieldiana Zoology new series*, 88:1-61. (A 2002 version is available at [www.fieldmuseum.org/philippine\\_mammals/](http://www.fieldmuseum.org/philippine_mammals/)).
- Heaney, L. R., M. Ruedi. 1994. A preliminary analysis of Biogeography and phylogeny of *Crocidura* from the Philippines. *Special Publication Carnegie Museum of Natural History* 18: 357-377.
- Heaney, L. R. and B. R. Tabaranza, Jr. 2006. A new species of forest mouse, genus *Apomys* (Mammalia: Rodentia: Muridae), from Camiguin Island, Philippines. *Fieldian Zoology, n.s.*, 106: 14–27.
- Heim de Balsac, H. 1967. Faits nouveaux concernant les *Myosorex* (Soricidae) de l'Afrique orientale. *Mammalia*, 31:610-628.
- Helin, S., N. Ohtaishi, and L. Houji. 1999. *The Mammalian of China*. China Forestry Publishing House. Beijing, China.
- Helgen, K. M. 2005. Systematics of the Pacific monkey-faced bats (Chiroptera: Pteropodidae), with a new species of *Pteralopex* and a new Fijian genus. *Systematics and Biodiversity* 3: 433–453.
- Helgen, K. M. 2005. The amphibious murines of New Guinea (Rodentia, Muridae): the generic status of *Baiyankamys* and description of a new species of *Hydromys*. *Zootaxa* 913: 1–20
- Helgen, K. M. and T. Flannery. 2004. A new species of bandicoot from western New Guinea. *Journal the Zoological society of London* 264: 117-124.
- Helgen, M. K. and D. E. Wilson. 2003. Taxonomic status and conservation relevance of the raccoons (*Procyon* spp.) of the west Indies. *Journal of the Zoological Society of London*. 259: 69-76.
- Helgen, K. M. and T. Flannery, 2004. Notes on the Phalangerid Marsuoidal genus *Spilocuscus*, with description of a new species from Papua. *Journal of Mammalogy* 85(5): 825-833.
- Helgen, K.M., Kock D., Gomez R. K. S. C., Ingle N. R. and M. H. Sinaga. 2007. Taxonomy and natural history of the southeast asian fruit-bat genus *Dyacopterus*. *Journal of Mammalogy*, 88:302–318.
- Heptner, V. G. 1939. The Turkestan desert shrew, its biology and adaptive peculiarities. *Journal of Mammalogy*, 20:139-149.
- Hershkovitz, P. 1990. Titis, New World monkeys of the genus *Callicebus* (Cebidae, Platyrrhini): a preliminary taxonomic review. *Fieldiana Zoology, n.s.* 55:1-109.
- Hershkovitz, P. 1990b. Mice of the *Akodon boliviensis* size class (Sigmodontinae, Cricetidae) with the description of two new species from Brazil. *Fieldiana, Zoology, n. s.*, 57.1-35.
- Hershkovitz, P. 1994. The description of a new species of South American holicudo, or long-nose

mouse genus *Oxymycterus* (Sigmodontinae, Muroidea), with a critical review of the generic content. *Fieldiana: Zoology*, n.s. 60: 1–43.

- Hinojosa, F.P., S. Anderson, and J.L. Patton, 1987. Two new species of *Oxymycterus* (Rodentia) from Peru and Bolivia. *American Museum Novitates* 2898: 1-17.
- Hisashi, A (ed). 1994. *A pictorial guide to the mammals of Japan*. Tokai University Press, Tokio.
- Hoffmann, F.G., E. P. Lessa, and M. F. Smith. 2002. Systematics of *Oxymycterus* with description of a new species from Uruguay. *Journal of Mammalogy* 83: 408–420.
- Hoffmann, R. S. 1984. A review of the shrew-moles (genus *Uropsilus*) of China and Burma. *Journal of the Mammalogical Society of Japan*, 10:69-80.
- Hoffmann, R. S. 1987. A review of the systematics and distribution of Chinese red-toothed shrews (Mammalia: Soricinae). *Acta Theriologica Sinica*, 7:100-139.
- Hoffmann, R.S. 1996. A research information system for mammals with Palaeartic examples. in: *Conserving China's Biodiversity (II)* (PETER Johan Schei, WANG Sung and XIE Yan eds.). China Environmental Science Press, Beijing.
- Holden, M. E. 1996. Description of a new species of *Dryomys* (rodentia, Myoxidae) from Balochistan, Pakistan, Including morphological compararison with *Dryomys laniger* Felten&Storch, 1968, and *D. nitedula* (Pallas, 1778). *Bonn. Zool. Beitr.*
- Honess, P. E. 1996. Speciation among Galagos (Primates: Galagidae) in Tanzanian Forests. Ph.D thesis, Oxford University, Oxford.
- Honess, P. E. and S.Bearder, 1996. Descriptions of the dwarf galago species of Tanzania. *African Primates* 2: 75-79.
- Hufnagl, E. 1972. *Libyan mammals*. Oleander Press, London
- Hutterer, R. 1994. Island rodents A new species of *Octodon* from Isla- Mocha, Chile (Mammalia, Octodontidae) . *Z. Saugetierkunde* 59: 27-41
- Hutterer, R. 1983. Taxonomy and distribution of *Crocidura fuscomurina* (Heuglin, 1865). *Mammalia*, 47:221-227.
- Hutterer, R. 1986. Diagnosen neuer Spitzm use aus Tansania (Mammalia: Soricidae). *Bonner Zoologische Beitrge*, 37:23-33.
- Hutterer, R. 1986a. African shrews allied to *Crocidura fischeri*: taxonomy, distribution and relationships. *Cimbebasia*, ser. A, 8:199-207.
- Hutterer, R. 1991. Variation and evolution of the Sicilian shrew: taxonomic conclusions and description of a possibly related species from the Pleistocene of Morocco (Mammalia: Soricidae). *Bonner Zoologische Beitr ge*, 42:241-251.
- Hutterer, R. and D. W. Yalden. 1990. Two new species of shrews from a relic forest in the Bale Mountain, Ethiopia. Pp. 63-72, in: *Vertebrates in the Tropics* (G. Peters and R. Hutterer, eds.). Museum Alexander Koenig, Bonn.
- Hutterer, R., and A. Dudu. 1990. Redescription of *Crocidura caliginea*, a rare shrew from northeastern Zaire. *Journal of African Zoology*, 104:305-311
- Hutterer, R., E. van der Straeten, and W. N. Verheyen. 1987b. A checklist of the shrews of Rwanda and biogeographic considerations on African Soricidae. *Bonner Zoologische Beitr ge*, 38:155-172.
- lack-Ximenes, E. G., M. De Vivo, A. R. Percequillo, 2005. A new species of *Echimys* Cuvier, 1809 (Rodentia, Echimyidae) from Brazil. *Papeis Avulsos de Zoologia, Museu de Zoologia da Universidade de São Paulo*. 45"51-60.

- Institute of Applied Ecology. 1999. *African Mammals Databank: A Databank for the Conservation and Management of the African Mammals* Vol 1 and 2. European Commission Directorate, Bruxelles. (Also available at [www.gisbau.uniroma1.it/amd/](http://www.gisbau.uniroma1.it/amd/) ).
- InfoNatura: Birds, mammals, and amphibians of Latin America [web application]. 2004. *Vampyressa thyone* - Northern Little Yellow-eared Bat. Version 4.1 . Arlington, Virginia (USA): NatureServe. Available: <http://www.natureserve.org/infonatura> .
- Itó, Y. , K. Miyagi and H. Ota. 2000. Imminent extinction crisis among the endemic species of the forest of Yanbaru, Okinawa, Japan. *Oryx*, 34: 305-316.
- Ivanitskaya E, G. Shenbrot and E. Nevo. 1996. *Crocidura ramona* sp nov (Insectivora, Soricidae): A new species of shrew from the central Negev desert, Israel. *Zeitschrift fur Saugetierkunde* 6: 93-103.
- Jennings, M.R. and G. B. Rathbun. 2001. *Petrodromus tetradactylus*. *Mammalian Species* 682: 1–6.
- Jenkins, P. D. and A. L. Smith., 1995. A new species of *Crocidura* (Insectivora: Soricidae) recovered from owl pellets in Thailand. *Bulletin of the Natural History Museum, London (Zoology)* 61: 103-109.
- Jenkins, P. D. 1992: Description of a new species of *Microgale* (Insectivora: Tenrecidae) from eastern Madagascar. *Bulletin of the Natural History Museum, London (Zoology)* 58: 53-59.
- Jenkins, P. D. and S. M. Goodman. 1999. A new species of *Microgale* (Lipotyphla, Tenrecidae) from isolated forest in south western Madagascar. *Bulletin of the Natural History Museum, London (Zoology)* 65: 155-164
- Jenkins, P. D., C. J. Raxworthy and R. A. Nussbaum. 1997. A new species of *Microgale* (Insectivora, Tenrecidae), with comments on the status of four other taxa of shrew tenrecs. *Bulletin of the Natural History Museum, London (Zoology)* 63: 1-12.
- Jenkins, P.D. y A.A. Barnett. 1997. A new species of water mouse, of the genus *Chibchanomys* (Rodentia, Muridae, Sigmodontinae) from Ecuador. *Bulletin of the Natural History Museum, London (Zoology)* 63:123-128.
- Jenkins, D.P., C. W. Kilpatrick, M. F. Robinson and R. J. Timmins 2005. Morphological and molecular investigations of a new family, genus and species of rodent (Mammalia: Rodentia: Hystricognata) from Lao PDR. *Systematics and Biodiversity* 2: 419-454.
- Jenkins, P., M. Ruedi and F. M. Catzeflis. 1998. A biochemical and morphological investigation of *Suncus dayi* (Dobson, 1988) and discussion of relationships in *Suncus* Hemprich and Ehrenberg, 1833, *Crocidura* Wagler, 1832, and *Sylvosorex* Thomas, 1904 (Insectivora: Soricidae). *Bonn. Zool. Beitr.* 47: 257-276.
- Jenkins, D.P. and Robinson M.F. 2002. Another variation on the gymnure theme: description of a new species of *Hylomys* (Lipotyphla, Erinaceidae, Galericinae). *Bulletin of the Natural History Museum, London (Zoology)* 68: 1–11
- Jiang X. and D. Lid 1994. Classification of existing subspecies on golden snub-nosed monkey, *Rhinopithecus roxellana* (Colobinae, Primates). In: Handbook and Abstracts. XVth Congress of the International Primatological Society, 3-8: 277. (Abstract)
- Jiang, X. L., and R. S. Hoffmann. 2001. A revision of the White-toothed Shrews (*Crocidura*) of southern China. *Journal of Mammalogy*, 82:1059-1079.
- Jones, J. K., Jr., and D. H. Johnson. 1965. Synopsis of the lagomorphs and rodents of Korea. *University of Kansas Publications, Museum of Natural History*, 16:357-407.
- Jones, T., C. L. Ehardt, T. M. Butynski, T. R. B. Davenport, N. E. Mpunga, S. J. Machaga, and D. W. De luca. 2005. The highland Mangabey *Lophocebus kipunji*: A new species of African Monkey. *Science* 3008: 1161-1164.
- Kalko, E.K.V., and C.O. Handley. 1994. Evolution, biogeography, and description of a new species



of fruit-eating bat, genus *Artibeus* Leach (1821), from Panama. *Zeitschrift fur Säugetierkunde* 59: 257- 273.

- Kappeler, P.M., Rasoloarison R.M., Razafimanantsoa L., Walter L. and Roos C. 2005. Morphology, behaviour and molecular evolution of giant Mouse lemurs (*mirza* spp.) Gray (1870), with description of a new species. *Primate Report* 71. 3-26
- Kefelioglu, H. and B. Krystufek. 1999. The taxonomic of *Microtus socialis* group (Rodentia: Microtinae) in Turkey, with the description of a new species. *Journal of Natural History*. 33: 289-303.
- Keld D. and M. H. Gallardo 1994. A New species of Tuco-Tuco genus *Ctenomys* (Rodentia, Ctenomyidae) from Patagonian Chile. *Journal of Mammalogy* 75: 338-348.
- Kiefer, A and M. Veith. 2001. A new species of long-eared bat from Europe (Chiroptera: Vespertilionidae) *Myotis* 39: 5-16.
- Kingdon, J. 1974a. *East African Mammals: An Atlas of Evolution in Africa volume 2, Part A: Insectivores and bats*. University Chicago Press, Chicago.
- Kingdon, J. 1974b. *East African Mammals: An Atlas of Evolution in Africa. Volume 2, Part B: Hares and rodents*. University Chicago Press, Chicago.
- Kingdon, J. 1977. *East African Mammals: An Atlas of Evolution in Africa. Volume 3, Part A: Carnivores*. University Chicago Press, Chicago.
- Kingdon, J. 1979. *East African Mammals: An Atlas of Evolution in Africa, Volume 3, Part B: Large Mammals*. University Chicago Press, Chicago.
- Kingdon, J. 1982. *East African Mammals: An Atlas of Evolution in Africa, Volume 3, Part D: Bovids*. University Chicago Press, Chicago.
- Kingdon, J. 1997. *The Kingdon Field Guide to African Mammals*. Academic Press, London, U.K.
- Kitchener, D. J., R. 1991. *Pseudantechinus mimulus* (Thomas, 10906) (Marsupialia, Dasyuridae): rediscovery and redescription. *Records of the Western Australian Museum*, 15: 191-202.
- Kitchener, D.J. and Maharadatunkamsi. 1991a. Description of a new species of *Cynopterus* from Nusa Tenggara, Indonesia. *Records of the Western Australian Museum*, 15: 307-363.
- Kitchener, D.J., R.A. H. Maharadatunkamsi, 1991b. A new species of *Nyctophilus* (Chiroptera: Vespertilionidae) from Lembata Island, Nusa Tenggara, Indonesia *Records of the Western Australian Museum* 15(1): 97-107.
- Kitchener, D.J. and I. Maryanto, 1993a. Taxonomic reappraisal of the *Hipposideros larvatus* species complex in the Greater and Lesser Sunda Islands, Indonesia. *Records of the Western Australian Museum*, 16: 119-173.
- Kitchener, D.J. and A. Suyanto, 1996. A new species of *Melomys* (Rodentia: Muridae) from Riama Island, Tanimbar Group, Maluku Tenggara, Indonesia *Records of the Western Australian Museum*, 18: 113-119.
- Kitchener, D.J. K:P. Aplin and Boead, 1991. A new species of *Rattus* from Gunung Mutis, South West Timor island, Indonesia. *Records of the Western Australian Museum*, 15: 445-461.
- Kitchener, D.J., R. A. How, and R.A. Maharadatunkamsi. 1991a. A new species of *Rattus* from the mountains of West Flores, Indonesia. *Records of the Western Australian Museum*, 15: 555-570.
- Kitchener, D.J., R. A. How, and R.A. Maharadatunkamsi. 1991b. *Paulamys naso* (Musser, 1981) (Rodentia: Muridae) from Flores Island, Nusa Tenggara, Indonesia: Description from a modern specimen and a consideration of its phylogenetic affinities. *Records of the Western Australian Museum*, 15: 171-190.
- Kitchener, D. J., N. Cooper, and I. Maryanto. 1995. The *Myotis adversus* (Chiroptera: Vespertilionidae) species complex in Eastern Indonesia, Australia, Papua New Guinea and

- the Solomon Islands. *Records of the Western Australian Museum*, 17: 191–212.
- Kitchener, A.C., Beaumont M.A., and Douglas R. 2006. Geographical Variation in the Clouded Leopard, *Neofelis nebulosa*, reveals two species. *Current Biology* 16, 2377–2383,
- Kobayashi, S. and Langguth, A. 1999. A new species of titi monkey, *Callicebus* Thomas, from north-eastern Brazil (Primates, Cebidae). *Revista. Brasileira de Zoologia*: 531-551.
- Kock, D. 1999. *Tadarida (Tadarida) latouchei*, a separate species recorded from Thailand with remarks on related Asian taxa (Mammalia: Chiroptera: Molossidae) - *Senckenbergiana biologica*, 78 (1/2): 237-240.
- Kock, D. and H.R. Bhat. 1994. *Hipposideros hypophyllus* n. sp. of the *H. bicolor*-group from peninsular India (Mammalia: Chiroptera: Hipposideridae). *Senckenbergiana biologica*, 73: 25-31.
- Kock, D. and G. Storch, G. 1996. *Thainycteris aureocollaris*, a remarkable new genus and species of vespertilionine bats from SE-Asia (Mammalia: Chiroptera: Vespertilionidae). *Senckenbergiana biologica*, 76: 1-6.
- Kock, D., Csorba, G. and K.M. Howell. 2000. *Rhinolophus maendeleo* n. sp. from Tanzania, a horseshoe bat noteworthy for its systematics and biogeography (Mammalia: Chiroptera: Rhinolophidae). *Senckenbergiana biologica*, 73: 233-239.
- Kock, D., Ingram C. M., Frabotta L. J., Honeycutt R.I. and H. Burda. 2006. On the nomenclature of Bathyergidae and *Fukomys* n. gen. (Mammalia: Rodentia). *Zootaxa* 1142: 51–55.
- Kowalski, K. and B. Rzebik-Kowalska. 1991. *Mammals of Algeria*. Polish Academy of Sciences, Warsaw.
- Kruskop SV, Tsytsulina KA. A new big-footed mouse-eared bat *Myotis annamiticus* sp nov (Vespertilionidae, Chiroptera) from Vietnam. *Mammalia* 65: 63-72 2001
- Kruskop, S.V. and K.A. Tsytsulina. 2001. A new big-footed mouse-eared bat *Myotis annamiticus* sp nov (Vespertilionidae, Chiroptera) from Vietnam. *Mammalia* 65: 63-72.
- Kruskop, S. V. and L. A. Lavrenchenko. 2000. A new species of long-eared bat (*Plecotus*; Vespertilionidae, Mammalia) from Ethiopia. *Myotis* 38: 5-17.
- Kryštufek, B. 2001. The distribution of the Levant Mole, *Talpa levantis*. *Zoology in the Middle East* 23, 2001: 17-21.
- Kuo, Hao-Chi, Fang Yin-Ping, Csorba G and Lee Ling-Ling. The definition of *Harpiola* (Vespertilionidae: Murininae) and the description of a new species from Taiwan. *Acta Chiropterologica*, 8: 11-19(9).
- Lara MC, Patton JL, Hingst-Zaher E. 2002. *Trinomys mirapitanga*, a new species of spiny rat (Rodentia : Echimyidae) from the Brazilian Atlantic Forest. *Mammalian Biology* 67 (4): 233-242.
- Larivière, S. 2003. *Amblonyx cinereus*. *Mammalian Species*, 720:1-5.
- Lavrenchenko, L. A. , W. N. Verheyen and J. Hulselmans. 1998. Systematic and distributional notes on the *Lophuromys flavopunctatus* Thomas, 1888 species-complex in Ethiopia (Muridae-Rodentia). *Bulletin de L'institut Royal Des Sciences Naturelles de Belgique Biologie* 68:199-214.
- Lavrenchenko LA, Likhnova OP, Baskevich MI, et al. 1998. Systematics and distribution of *Mastomys* (Muridae, Rodentia) from Ethiopia, with the description of a new species. *Zeitschrift fur Säugetierkunde* 63: 37-51.
- Lavrenchenko, A. N., V. Milisnikov, M. Aniskin and A. A. Warshavsky. 1999. Systematics and phylogeny of the genus *Stenocephalemys* Frick, 1914 (Rodentia, Muridae) : a multidisciplinary approach. *Mammalia* 63: 475-493.
- Lay, D. M. 1983. Taxonomy of the genus *Gerbillus* (Rodentia: Gerbillinae) with comments on the applications of generic and subgeneric names and an annotated list of species. *Zeitschrift fur Säugetierkunde*, 48:329-354.

- Lekagul, B. and J. A. McNeely. 1988. *Mammals of Thailand*. Darnsutha Press, Bangkok, Thailand.
- Leo, M. and A. L. Gardner. 1993. A new species of a giant *Thomasomys* (Mammalia: Muridae: Sigmodontinae) from the Andes of Northcentral Peru. *Proceedings of the Biological Society of Washington*, 106:417-428.
- Lei, R., Z. Hu., Z. Jiang and W. Yang. Phylogeography and genetic diversity of the critically endangered Przewalski's gazelle. 2003. *Animal Conservation* 6: 361-367.
- Leite, Y.L. 2003. Evolution and systematics of the Atlantic Tree Rats, genus *Phyllomys* (Rodentia, Echimyidae), with description of two new species. *University of California Publications in Zoology*. 132: 1-118.
- Lee, J. R., J. Riley, I. Hunowu and E. Maneasa. 2003. The sulawesi palm civet: expanded distribution of a little know endemic viverrid. *Oryx* 37(3):378-381.
- Lemos, B. M. Weksler and C. R. Bonvicino. 2000. The taxonomic status of *Monodelphis umbristriata* (Didelphimorphia: Didelphidae). *Mammalia* 64(3): 329-337.
- Lew, D., R. Perez-Hernandez, and J. Ventura. 2006. Two new species of *Philander* (Didelphimorphia, Didelphidae) from Northern South America. *Journal of Mammalogy*, 87:224-237.
- Lindenmayer, D. B., J. Dubach, and K.L. Viggers. 2002. Geographic dimorphism in the Mountain Brushtail Possum (*Trichosurus caninus*) - the case for a new species. *Australian Journal of Zoology*, 50: 369 – 393.
- Lorini, M. L. y V. G. Persson. 1990. Nova especie de *Leontopithecus* Lesson, 1840, do sul do Brasil (Primates, Callitrichidae). *Boletim do Museu Nacional*, 338:1-14.
- Loy, A., S. Di Martino and D. Capolongo. 1996. Patterns of geographic variation of *Talpa romana* Thomas (Insectivora, Talpidae). Preliminary results derived from a geometric morphometric approach. *Mammalia* 60: 77-89.
- Louis, E. E. Jr. *et al.* Revision of the mouse Lemurs (*Microcebus*) of Eastern Madagascar *International Journal of Primatology*, 27: 347-389.
- Luna, L. and V. Pacheco. 2002. A new species of *Thomasomys* (Muridae: Sigmodontinae) from the Andes of southeastern Peru. *Journal of Mammalogy* 83: 834-842.
- Luna W., L. and B. D. Patterson. 2003. A remarkable new rodent from Peru (Muridae: Sigmodontinae), with comments on the affinities of *Rhagomys rufescens* (Thomas, 1886). *Fieldiana: Zoology*, 101: 1 – 24.
- Maeda K, and S. Matsumur. 1998. Two new species of vespertilionid bats, *Myotis* and *Murina* (Vespertilionidae : Chiroptera) from Yanbaru, Okinawa Island, Okinawa Prefecture, Japan. *Zoology Science* 15: 301-307.
- Maisels, F., E. Keming, M. Kemei and C. Toh. 2001. The extirpation of large mammals and implications for montane forest conservation: the case of the Kulum-Ijim forest, north-west province Cameroon. *Oryx* 35: 322-331.
- Mallon, D. P. and S.C. Kingswood. 2001. *Antelopes : global survey and regional action plans : Part 4. North Africa, the Middle East, and Asia*. IUCN, Glanz, Switzwerland
- Maharadatunkamsi, S. H., D. J. Kitchener and L. H. Schmitt. 2000. Genetic and morphometric diversity in Wallacea geographical patterning in the horse shoe bat, *Rhinolophus affinis* *Journal of Biogeography* 27: 193-201
- Malygin, V. M., V. M. Aniskin, S. I. Isaev y A. N. Milishnikov. 1994. *Amphinectomys savamis* Malygin Gen. et sp. n., a new genus and a new species of water rat (Cricetidae, Rodentia) from Peruvian Amazonia. *Zoologicheskii Zhurnal*, 73: 195-208.
- Mares, M. A., and J. K. Braun. 1996, A new species of phyllotine rodent, genus *Andalgalomys*

- (Muridae: Sigmodontinae), from Argentina: *Journal of Mammalogy*. 77: 928–941.
- Mares, M. A. and J. K. Braun. 2000. Three new species of *Brucepattersonius* (Rodentia: Sigmodontidae) from misiones province. Argentina. *Occasional Papers. Sam Noble Oklahoma Museum of Natural History* 9:1-13.
- Mares, M. A., J. K. Braun, R. M. Barquez, and M. M. Díaz. 2000. Two new genera and species of halophytic desert mammals from isolated salt flats in Argentina: *Occasional Papers, Museum of Texas Tech University*. 20: 1–27.
- Marques, S. A. 1993. A systematic review of the large species of *Artibeus* Leach, 1821 (Mammalia: Chiroptera) with some phylogenetic inferences. Tesis doctoral, Universidad George Washington. Washington D.C., EUA.
- Mayor, I. M., J. A. Sommer, M. L. Houck, J. R. Zaonarivelo, P. C. Wright, C. Ingram, S.R. Engel and E. E. Louis. Specific Status of *Propithecus* spp. *International Journal of Primatology* 25 (4): 875-900.
- Matveev, V. A., S. V. Kruskop and D. A. Kramerov, 2005. Revalidation of *Myotis petax* Hollister, 1912 and its new status in connection with *M. daubentonii* (Kuhl, 1817) (Vespertilionidae, Chiroptera). *Acta Chiropterologica* 7(1):23-27.
- Mapatuna, Y., M. B. Gunasekera, W. D. Ratnasooriya, N. C. W. Goonesere, and P. J. J. Bates. 2002. Unravelling the taxonomic status of the genus *Cynopterus* (Chiroptera: Pteropodidae) in Sri Lanka by multivariate morphometrics and mitochondrial DNA sequence analysis. *Mammalian biology* 67:321-337.
- McCarthy, T.J., Albuja V.L. and M.S. Alberico. 2006. A new species of Chocoan *Sturnira* Chiroptera: Phyllostomidae: Stenodermatinae) from western Ecuador and Colombia. *Annals of Carnegie Museum*. 75: 97—110.
- Menkhorst, P. and F. Knight. 2001. *A Field Guide to the Mammals of Australia*. Oxford University Press, New York.
- Merker, S. and C.P. Groves. 2006. *Tarsius lariang*: A new primate species from Western Central Sulawesi. *International Journal of Primatology*, 27: 465-485.
- Meyer, M. N. and V.G. Malikov. 2000. New species and subspecies of mouse-like hamsters of the genus *Calomyscus* (Rodentia, Cricetidae) from southern Turkmenistan. *ZOOLOGICAL JOURNAL* 79 : 219-223.
- Miranda, J.M.D., I. P. Bernardi and F. C. Passos. 2006. A new species of *Eptesicus* (Mammalia: Chiroptera: Vespertilionidae) from the Atlantic Forest, Brazil. *Magnolia Press. Zootaxa* 1383: 57–68.
- Mitchell-Jones, A.J., G. Amori, W. Bogdanowicz, B. Krystufek, P.J.H. Reijnders, F. Spitzenberger, M. Stubbe, J. B. M. Thossen, V. Vohralík and J. Zima. 1999. *The Atlas of European Mammals*. Academic Press, London.
- Mittermeier, R. A., I. Tattersall, W. R. Konstant, D. M. Meyers and R. B. Mast. 1994. *Lemurs of Madagascar*. Conservation International. Washington, DC.
- Mittermeier, R. A., M. Schwarz and J. M. Ayres. 1992. A new species of marmoset, genus *Callithrix* Erxleben, 1777 (Callitrichidae, Primates), from the Rio Maués region, state of Amazonas, central Brazilian Amazonia. *Goeldiana, Zoologia*, 14:1-17.
- Molour, S. et al. 2002. *Status of South Asian Chiroptera. Conservation Assessment and Management Plan (CAMP)*. Workshop Report, Conservation Breeding Specialist Group, IUCN, Gland.
- Monteiro-Filho, E. L. de A.,\* Monteiro L. R., and S. F. Dos Reis. 2002. Skull shape and size divergence in dolphins of the Genus *Sotalia*: a tridimensional Morphometric analysis. *Journal of Mammalogy*, 83:125–134.

- Motokawa, M., L-K Lin, H-C Cheng and M. Harada. 2001. Taxonomic status of the Senkaku mole, *Nesosaptor uchidai*, with special reference to variation in *Mogera insularis* from Taiwan (Mammalia: Insectivora). *Zoological Science* 18:733-740.
- Mucedda, M. Kiefer, A. Pidincheda, E. Veith, M. 2002. A new species of long-eared bat (Chiroptera, Vespertilionidae) from Sardinia (Italy). *Acta Chiropterologica*, 4: 212-135.
- Muchhala, N., M. P. Mena and L. Albuja. 2005. A new species of *Anoura* (Chiroptera: Phyllostomidae) from the Ecuadorian Andes. *Journal of Mammalogy* 86: 457-461.
- Muñoz, J. y Cuartas, C. A, 2001. *Saccopteryx antioquiensis* n. sp. (Chiroptera: Emballonuridae) del Noroeste de Colombia. *Actual Biology* 23 (75): 53-61.
- Musser, G. G. 1979. Results of the Archbold Expeditions. No. 102. The species of *Chiropodomys*, arboreal mice of Indochina and the Malay Archipelago. *Bulletin of the American Museum of Natural History*, 162:377-445.
- Musser, G. G., and Boeadi. 1980. A new genus of murid rodent from the Komodo islands in Nusatenggara, Indonesia. *Journal of Mammalogy*, 61:395-413
- Musser, G.G. 1991. Sulawesi Rodents: Descriptions of new species of *Bunomys* and *Maxomys* (Muridae, Murinae). *American Museum Novitates* 3001: 1- 41.
- Musser, G.G. and J. L. Patton. 1989. Systematic studies of Oryzomyine Rodents (Muridae): the identity of *Oecomys phelpsi tate*. *American Museum Novitates* 2961[ 1 – 6.
- Musser, G.G., and Sommer H.G. 1992. Taxonomic Notes on Specimens of the Marsupials *Pseudocheirus schlegelii* and *P. forbesi* (Diprotodontia, Pseudocheiridae) in The American Museum of Natural History. *American Museum Novitates*, 3044: 1-16.
- Musser, G.G. and L. A. Durden. 2002. Sulawesi rodents: description of a new genus and species of Murinae (Muridae, Rodentia) and its parasitic new species of sucking louse (Insecta, Anoplura). *American Museum Novitates*, 3368: 1- 50.
- Musser, G. G. Heaney, L. R. And B. R. Jr. Tabaranza. 1998. Philippine rodents: Redefinitions of know species of *Batomys* (Muridae, Murinae) and description of a new species from Dinagat island. *American Museum Novitates* 3237: 1- 51.
- Musser, G.G., Smith I.A., Robinson M. F and Lunde P.D. 2005. Description of a new genus and species of rodent (Murinae, Muridae, Rodentia) from the Khammouan Limestone National Biodiversity Conservation Area in Lao PDR. *American Museum Novitates*, 3497: 1-31.
- Musser, G.G. Lunde D.P. and N.Truong Son. 2006. Description of a New Genus and Species of Rodent (Murinae, Muridae, Rodentia) from the Tower Karst Region of Northeastern Vietnam. *American Museum Novitates*, 3517: 1-41.
- Mustrangi, M.A., and J. L. Patton. 1997. Phylogeography and systematics of the Slender mouse opossum *Marmosops* (Marsupialia, Didelphidae). *University of California Publications, Zoology*, 130:1-86.
- Nicoll, M. E. and G. B. Rathbun. 1990. *African insectivora and elephant-shrew action plan*. IUCN, Gland, Switzerland.
- Niemitz, C., A. Nietsch, S. Warter, and Y. Rumpler. 1991. *Tarsius dianae*: a new primate species from Central Sulawesi (Indonesia). *Folia Primatologica* 56:105-116.
- Norris, A. Ch. and G.G. Musser. 2001. Systematic revision within the *Phalanger orientalis* complex (Diprotodontia, Phalangeridae) a third species of lowland gray cuscus from New Guinea and Australia. *American Museum Novitates*, 3356: 1-20.

- O'Leary, R. 2003. An annotated catalog of the African Primate genera *Colobus* and *Procolobus* (Cercopithecidae: Colobinae) in the collections of the American Museum Natural History. *American Museum Novitates*, 3399: 1-26.
- Oates, J. F. (ed). 1996. *African primates: status survey and conservation action plan*. IUCN, Gland, Switzwerland
- Ochoa J, M Aguilera, V Pacheco, 2001. A new species of *Aepeomys* Thomas, 1898 (Rodentia : Muridae) from the Andes of Venezuela. *Mammalian Biology* 66 (4): 228-237.
- Oliver, W. (ed). 1993. *Pigs, Peccaries and Hippos Status Survey and Action Plan*. IUCN, Glanz, Switzwerland.
- Olson, L.E., Goodman S.M. and Yoder A.D. 2004. Illumination of cryptic species boundaries in long-tailed shrew tenrecs (Mammalia: Tenrecidae; *Microgale*), with new insights into geographic variation and distributional constraints. *Biological Journal of the Linnean Society*, 83, 1–22.
- Osman Hill, W. C. 1933. A monograph on the genus *Loris*. *Ceylon Journal of Science (Spolia Zeylanica)*, 18: 89 –129.
- Ohdachi, D. S., Iwasa, M. A. Nesterennko, A. V. Abe, H. Masuda, R. Haberl, W. 2004. Molecular phylogenetics of *Crocidura* shrews (Insectivora) in east and central asia. *Journal of Mammalogy* 85: 396-403.
- Pacheco, V. 1991. A new species of *Scolomys* (Muridae: Sigmodontinae) from Perú. *Publicaciones del Museo de Historia Natural, Universidad Nacional Mayor de San Marcos, (A)*, 37:1-3.
- Pacheco, V. y B. D. Patterson. 1992. Systematics and biogeographic analyses of four especies of *Sturnira* (Chiroptera: Phyllostomidae) with emphasis on Peruvian forms. *Memorias del Museo de Historia Natural, Universidad Nacional Mayor de San Marcos*, 21: 57-81.
- Pacheco, V. y J. L. Patton. 1995. A new species of the puna mouse, genus *Punomys* Osgood, 1943 (Muridae, Sigmodontinae) from the Southeastern Andes of Peru. *Zeitschrift für Saugetierkunde*, 60:85-96.
- Pacheco, V., Solari, S. and Velazco, P. M. 2004. A new species of *Carollia* (Chiroptera: Phyllostomidae) from the andes of Peru and Bolivia. *Occasional Papers Museum of Texas Tech University* 236: 1-16.
- Pacheco, V., B. D. Patterson, J. L. Patton, L. H. Emmons, S. Solari y C. F. Ascorra. 1993. List of mammal species known to occur in Manu Biosphere Reserve, Perú. *Publicaciones del Museo de Historia Natural, Universidad Nacional Mayor de San Marcos, (A)*, 44:1-12.
- Parnaby, H.E. (2002). A taxonomic review of the genus *Pteralopex* (Chiroptera: Pteropodidae) the monkey-faced bats of the South-western Pacific. *Australian Mammalogy*, 23: 145-162.
- Parnaby, H. E. 2002. A new species of long-eared bat (Nyctophilus: Vespertilionidae) from new Caledonia. *Australian Mammalogy* 23: 115-124.
- Pardiñas, U.F.J., G. D'Elía, Cirignoli, S. P. Suarez. 2005. A new species of *Akodon* (Rodentia, Cricetidae) from the northern campos grasslands of Argentina. *Journal of Mammalogy*, 86 (3):462-474.
- Patterson, B. D., G. Ceballos, W. Sechrest, M. Tognelli, T. Brooks, P. Ortega, I. Salazar, y B. E. Young. 2003. *Digital Distribution Maps of the Mammals of the Western Hemisphere, version 1.0*. NatureServe, Arlington, Virginia.
- Patterson, B. J. 2000. Patterns and Trends in the discovery of new Neotropical mammals. *Diversity and Distributions* 6: 145-151.
- Patterson, B. J. 2002. On the continuing need for scientific collecting mammals. *Journal Neotropical Mammalogy* 9: 253-262.
- Patton, J. L. and M. N. F. Da Silva. 1995. A review of the spiny mouse genus *Scolomys* (Rodentia,

- Muridae, Sigmodontinae) with the description of a new species from the western Amazon of Brazil. *Proceedings of the Biological Society of Washington* 108: 319-337
- Patton, J. L., Da Silva, M. N. and Malcolm, J. R. Mammals of the rio Juruá and the evolutionary and ecological diversification of Amazonia. *Bulletin of the American Museum of The Natural History* 244. 3-306
- Patton, J. L. 1990. Species groups of spiny rats genus *Proechimys* (Rodentia: Echimyidae). *Fieldiana: Zoology*, 39:305-345.
- Patton, J.L., and M.N.F. da Silva. 1997. Definition of species of pouched four eyed opossums (Didelphidae, *Philander*). *Journal of Mammalogy*, 78(1):90-102.
- Percequillo, A.R., Carmignotto A.P., and M.J. De J. Silva. 2005. A new species of *Neusticomys* (Ichthyomyini, Sigmodontinae) from central Brazilian Amazonia. *Journal of Mammalogy*, 86(5):873-880.
- Peter W.P., and A. Feiler. 1994. A new bovid species from Vietnam and Cambodia (Mammalia: Ruminantia). *Zool Abh Mus Tierkd Dresden* 48:169-176
- Pires Costa, L., Y. L. R. Leite and J. L. Patton. 2003. Phyleogeography and systematic notes on two species of gracile mouse opossums, genus *Gracilinanus* (Marsupialia: Didelphidae) from Brazil. *Proceedings of the Biological Society of Washington* 116: 275-292.
- Pine, R. H.; N. Woodman and R. M. Timm. 2002. Rediscovery of enders's small-eared shrew, *Cryptotis endersi* (Insectivora: Soricidae), with a redescription of the species. *Mammalian Biology* 67: 372-377.
- Peterson, R. L. 1971. The African molossid bat *Tadarida russata*. *Canadian Journal of Zoology*, 49: 297-301.
- Pontes, A. R., Malta A. and P.H. Asfora. 2006. A new species of capuchin monkey, genus *Cebus* Erxleben (Cebidae, Primates): found at the very brink of extinction in the Pernambuco Endemism Centre. *Zootaxa* 1200: 1-12
- Powell, V. J. and S. C. Wehnelt. 2003. A new estimate of the population size of the critically endangered Rodrigues fruit bat *Pteropus rodricensis*. *Oryx* 37: 353-357.
- Queiroz, H. L. 1992. A new species of capuchin monkey, genus *Cebus* Erxleben 1977 (Cebidae, Primates), from eastern Brazilian Amazonia. *Goeldiana Zoologia* (15): 1-3.
- Quérouil S., E. Verheyen and M. Colyn. 2003. Patterns of diversification in two African forest shrews: *Sylvisorex johnstoni* and *S. ollula* (Soricidae, Insectivora) in relation to Paleoclimatic changes. *Molecular Phylogenetics and Evolution*, 28: 24-37.
- Ranivo, J. and S. M. Goodman. 2006. Révision taxinomique des *Triaenops* malgaches (Mammalia, Chiroptera, Hipposideridae) *Zoosystema* 28 (4): 963-985.
- Ravaoarimanana, L. B., Tiedeman, R., Montagnon and Y. R. Rumplex. Molecular and cytogenetic evidence for cryptic speciation within a rare endemic Malagasy lemur, the northern sportive lemur (*Lepilemur septentrionalis*). *Molecular Phylogenetics and Evolution* 31 440-448.
- Rasoloarison, R.M., S. M. Goodman and J. U. Ganzhorn. 2000. Taxonomic revision of mouse lemurs (*Microcebus*) in the western portions of Madagascar. *International Journal of Primatology*, 21: 963-1019.
- Reid, F. A. 1997. *A Field Guide to the Mammals of Central America and Southeast Mexico*. Oxford University Press, New York.
- Reyes, J. C., J. G. Mead y K. Van Waerebeek. 1991. A new species of beaked whale *Mesoplodon peruvianus* sp. n. (Cetacea: Ziphiidae) from Peru. *Marine Mammal Science*, 7:1-24.
- Richards, G.C. and L.S. Hall. 2002. A new flying-fox of the genus *Pteropus* (Chiroptera: Pteropodidae) from Torres Strait, Australia. *Australian Zoologist*. 32: 69-75.
- Rickart, E. A., L. Heaney, B. Tabaranza, and D. Balete. 1998. A review of the genera *Crunomys* and

- Archboldomys* (Rodentia: Muridae: Murinae), with descriptions of two new species from the Philippines. *Fieldiana: Zoology*, n.s. 89:1-24.
- Rickart, E. A., L. R. Heaney, and B. R. Tabaranza Jr. 2002. Review of *Bullimus* (Muridae: Murinae) and a description of a new species from Camaguin island, Philippines. *Journal of Mammalogy*, 83 (2): 421–436.
- Rickart, E. A., L. R. Heaney, and B. R. Tabaranza, Jr. 2003. A new species of *Limnomys* (Rodentia: Muridae: Murinae) from Mindanao Island, Philippines. *Journal of Mammalogy* 85(4): 1443-1455.
- Rickart, A. E., L. R. Heaney, S. M. Goodman and S. Jansa. 2005. Review of the Philippine genera *Chrotomys* and *Celaenomys* (Murinae) and Description of a new species. *Journal of mammalogy*, 86 (2): 415-428.
- Riskin, D. K. 2001. Mammalian Species. *Pipistrellus bodenheimeri*. The American Society of Mammalogists. 651: 1–3.
- Romo-Vázquez, E. L. León-Paniagua and Sanchez, O. 2005. A new species of *Habromys* (Rodentia: Neotomiae) from México. *Proceedings of the Biological Society of Washington* 118: 605-618.
- Robbins, C. B., and E. van der Straeten. 1989. Comments on the systematics of *Mastomys* Thomas 1915 with the description of a new West African species. *Senckenbergiana Biologica*, 69:1-14.
- Roca, A. L., N. Georgiadis, J. Pecon-Slattey, et al. 2001. Genetic evidence for two species of elephant in Africa. *Science* 293:1473-1477.
- Rodin, M. R., Steven M. G. and J.U. Ganzhorn. 2000. Taxonomic revision of Mouse Lemurs (*Microcebus*) in the Western Portions of Madagascar. *International Journal of Primatology*. Vol 21, NO. 6, pp 963-1019.
- Rodrigues, R. R. L. , Barros, R. M. S. Pissinati, A. Pieczarka, J. C. , Nagamachi, C. Y. 2004. A new karyotype of an endangered primate species (*Callicebus personatus*) from the Brazilian Atlantic forest. *Hereditas* 140: 87-91.
- Rosevear, D. R. 1965. *The bats of West Africa*. The British Museum, London.
- Rovero, F. and Rathbun G.B. 2006. A potentially new giant sengi (elephant-shrew) from the Udzungwa mountains, Tanzania. *Journal of East African Natural History*. 95: 111–115.
- Rovero, F., G. B. Rathbun , A. Perkin, T. Jones, D. O. Ribble, C. Leonard, R. R. Mwakisoma and N. Doggart .2008. A new species of giant sengi or elephant-shrew (genus *Rhynchocyon*) highlights the exceptional biodiversity of the Udzungwa Mountains of Tanzania. *Journal of Zoology*, 274: 126 -133.
- Rozhnov, V.V., G.V. Kutznetzov, and P. A. Anh. 1992. New distributional information on Owston's palm civet. *Small Carnivore Conservation* 6:7.
- Ruedas, L. A. 1995. Description of a new large-bodied species of *Apomys* Mearns, 1905 (Mammalia, Rodentia, Muridae) from Mindoro islands, Philippines. *Proceedings of the Biological Society of Washington*, 108: 302-318
- Ruedi, M. 1995. Taxonomic revision of shrews of the genus *Crocidura* from the Sunda Shelf and Sulawesi with description of two new species (Mammalia: Soricidae). *Zoological Journal of the Linnean Society*, 115: 211-265.
- Ruedi, M. and Arlettaz. 1991. Biochemical systematics of the Savi's bat (*Hypsugo savii*) (Chiroptera: Vespertilionidae). *Z. zool. Systematic Evolutionforsch* 29: 115:122.
- Ruedi, M. and L. Fumagalli. 1996. Genetic structure of Gymnures (genus *Hylomys*; Erinaceidae) on continental islands of Southeast Asia: historical effects of fragmentation. *Journal. Zoology*



- Ruedi, M., M. Chapuisat and D. Iskandar. 1994. Taxonomic status of *Hylomys parvus* and *Hylomys suillus* (Insectivora: Erinaceidae): Biochemical and Morphological analyses. *Journal of Mammalogy* 75: 965-978.
- Ruedi, M., T. Maddalena, P. Vogel, and Y. Obara. 1993. Systematics and biogeographic relationships of the white-toothed shrew (*Crocidura dsinezumi*). *Journal of Mammalogy*, 74: 535-543.
- Ruedi, M., Ph. Jourde, P. Giaosa, M. Barataud and S. Y. Roudé. 2001. DNA reveals the existence of *Myotis alcaethoe* in France (Chiroptera: Vespertilionidae). *Revue Suisse de Zoologie* 109 : 643-652.
- Russo, D. and G. Jones. 2000. The two cryptic species of *Pipistrellus pipistrellus* (Chiroptera: Vespertilionidae) occur in Italy: evidence from echolocation and social calls. *Mammalia* 64(2): 187-197.
- Sicard, B; M. Tranier; and J-C. G, 1988. Un rongeur nouveau du Burkina Faso (ex Haute-Volta): *Taterillus petteri*, sp. nov. (Rodentia, Gerbillidae). *Mammalia* 52:187-198.
- Sanchez-Hernández, C., Romero-Almaraz M.L. and Schnell G.D. 2005. New Species of *Sturnira* (Chiroptera: Phyllostomidae) from Northern South America. *Journal of Mammalogy*, 86(5):866–872.
- Sarmiento, E. 1997-1998. The validity of "*Pseudopotto martini*". *African Primates* 3(1-2): 44-45.
- Schaller, G. B. 1998. *Wildlife of the Tibetan Steppe*. University of Chicago Press, Chicago.
- Schaller, G. B., and E. S. Vrba. 1996. Description of the giant muntjac (*Megamuntiacus vuquangesis*) in Laos. *Journal of Mammalogy*, 77:675-683.
- Schwartz, J., H. 1996. *Pseudopotto martini*: A new genus and species of extant loriforme primate. *Anthropological Papers of the American Museum of Natural History*, 78: 1-14.
- Seamark, E.C.J. 2005. African Bat Conservation News. Vol. 6
- Sewall, B., E. F. Granek and W. J. Treehella. 2003. The endemic Comoros Islands fruit bat *Rousettus obliviosus*: ecology, conservation and red list status. *Oryx* 37: 344-352.
- Shackleton, D. M. (Editor). 1997. *Wild Sheep and Goats and their Relatives. Status Survey and Action Plan for Caprinae*. IUCN: Gland, Switzerland.
- Sinha, A. A. Datta, M. D. Madhusudan and C. Mishra. The Arunachal macaque *Macaca munzala*: a new species from western Arunachal Pradesh, northeastern India. *International Journal of Primatology* (in press).
- Silva Jr., J. S. and Noronha, M. de A. 1998. On a new species of bare-eared marmoset, genus *Callithrix* Erxleben, 1777, from central Amazonia, Brazil (Primates: Callitrichidae). *Goeldiana Zoologia* (21): 1-28.
- Silva M.J.D, A. R. Percequillo, T. Yonenaga-Yassuda. 2000. Cytogenetics and systematic approach on a new *Oryzomys* species, of the nitidus group (Sigmodontinae, Rodentia) from Northeastern Brazil. *Caryologia* 53 (3-4): 219-226.
- Simmons, N. 2005. Order Chiroptera. In: *Mammals of the World: A taxonomic and Geographic Reference* (D. E. Wilson and D. M. Reeder, eds). Third Edition. Smithsonian Institution Press, Washington D.C.
- Simmons, B. N. 1996. A new species of *Micronycteris* (Chiroptera: Phyllostomidae) from Northeastern Brazil, with comments on phylogenetic relationships. *American Museum Novitates* 3158: 1 – 34. .
- Simmons, N. B., Voss, R. S. and Fleck, D. W. 2002. A new Amazonian species of *Micronycteris* (Chiroptera: Phyllostomidae) with notes on the roosting behavior of sympatric congeners.-

*American Museum Novitates*: 3358, 1-14

- Skinner, J. D., and R. H. N. Smithers. 1990. *The mammals of the Southern African Subregion*. University of Pretoria, Pretoria, Republic of South Africa.
- Sokolov V.E., V.V. Rozhnov, and P.T. Anh. 1997. New species of viverrids of the genus *Viverra* (Mammalia, Carnivora) from Vietnam. *ZOOL ZH* 76: 585-589
- Solmsdorff, K; Kock, D. Hohoff, Ch and Sachser, N. 2004. Comments on the genus *Galea* Meyen 1833 with description of *Galea monasteriensis* n.sp. from Bolivia (Mammalia, Rodentia, Caviidae). *Senckenbergiana biológica* 84 (172):137-156.
- Solary, S. 2004. A new species of *Monodelphis* (Didelphimorphia: Didelphidae) from southeastern Peru. *Mammalian Biologist* 69: 145-152.
- Solary, S. 2004. A new species of *Monodelphis* (Didelphimorphia: Didelphidae) from southeastern Peru with notes on *M. Adusta* (thomas, 1897). *Journal of Mammalogy*, 88:319–329.
- Solary, S. and R.J. Baker. 2006. Mitochondrial DNA Sequence, Karyotypic, and Morphological Variation in the *Carollia Castanea* Species Complex (Chiroptera: Phyllostomidae) with description of a New Species. *Occasional Paper, Museum of the Texas Tech University* 254: 1-16
- Spotorno, A. E., H. Cofre, G. Manriquez G. et al. 1998. A new species of *Loxodontomys*, another phyllotine mammal from the Andes of central Chile. *Revista Chilena de Historia Natural* 71: 359-373.
- Spitzenberger, F., J. Piálek and E. Haring. 2001. Systematics of the genus *Plecotus* (Mammalia, Vespertilionidae) in Austria based on morphometric and Molecular investigations. *Filio Zoologica* 50(3); 161-172.
- Spitzenberger, F., Strelkov P.P., Winkler H. and Haring E. 2006. A preliminary revision of the genus *Plecotus* (Chiroptera, Vespertilionidae) based on genetic and morphological results. *Zoologica Scripta*, 35 : 187–230.
- Steppan, S. J. 1995. Revision of the tribe Phyllotini (Rodentia, Sigmodontinae), with a phylogenetic hypothesis for the Sigmodontinae. *Fieldiana Zoology, New series*, 1464: 1-112.
- Steven J. B. Cooper, S.J.B., P. R. Day, T. B. Reardon, and M. Schulz. 2001. Assessment of species boundaries in Australian *Myotis* (Chiroptera: Vespertilionidae) using mitochondrial DNA. *Journal of Mammalogy* 82:328-338.
- Stone, D. 1995. *Eurasian insectivores and tree shrews: status survey and conservation action plan*. IUCN, Gland, Switzerland.
- Strahan, R. 1995. *Mammals of Australia*. Smithsonian Institution Press. Washington, DC.
- Surridge, A. K., R. J. Timmins, G. M. Hewitt, and D. J. Bell. 1999. Striped rabbits in Southeast Asia. *Nature*, 400: 726.
- Tejedor, A. 2005. A new species of Funnel-Eared bat (*Natalidae: Natalus*) from Mexico. American Museum of Natural History. *Journal of Mammalogy*, 86: 1109–1120.
- Thalmann, U. and T. Geissmann. 2000. Distributions and geographic variation in the western woolly lemur (*Avahi occidentalis*) with description of a new species (*A. unicolor*). *International Journal of Primatology*, 21: 915-941.
- Thabah, A., Rossiter S. J., Kingston T., Zhang S., Parsons S, Mya M. K., Zubaid A. and Jones G. 2006. Genetic divergence and echolocation call frequency in cryptic species of *Hipposideros larvatus* s.l. (Chiroptera: Hipposideridae) from the Indo-Malayan region. *Biological Journal of the Linnean Society*. 88(1): 119-130.
- Trivedi, P. B. 2002. Two new primate species discovered. *National Geographic Today*. June 24.

- Timmins, R. J., J. W. Duckworth, C. R. Robson and J. L. Walston. 2003. Distribution, status and Ecology of the mainland slender-tailed treeshrew *Dendrogale murina*. *Mammal Rev.* 33:272-283.
- Topál, G. 1997. A new mouse-eared bat species from Nepal, with statistical analyses of some other species of subgenus *leuconoe* (Chiroptera, Vespertilionidae). *Acta zoologica Academiae Scientiarum Hungaricae* 43 (4): 375-402
- Van der Straeten, E. and J. C. K. Peterhans. 1999. *Praomys degraaffi*, a new species of Muridae (Mammalia) from central Africa. *South African Journal of Zoology* 34: 80-90.
- Van Cakenberghe V. and F. De Vree. 1998. Systematics of African *Nycteris* (Mammalia: Chiroptera) Part III. The *Nycteris thebaica* group. *Bonn. Zool. Beitr* 48(2): 123-166.
- Van Cakenberghe V. and F. De Vree. 1993. The systematic status of Southeast Asian *Nycteris* (Chiroptera: Nycteridae). *Mammalia* 57:227-244.
- Van Cakenberghe V. and F. De Vree. 1994. A revision of the Rhinopomatidae Dobson 1872, with the description of a new subspecies (Mammalia: Chiroptera). *Senckenbergiana biologica* 73 (1-2): 1-24.
- Van Daele, G. A. A. P., P. Dammann, J. L. Meir, M. Kawalika, C. Van De Woestijne and H. Burda. 2004. Chromosomal diversity in mole-rats of the genus *Cryptomys* (Rodentia: Bathryergidae) from the Zambezi region: with descriptions of the new karyotypes. *Journal of the Zoological Society of London* 264:317-326.
- Van Roosmalen, M. G. M. and Van Roosmalen, T. 2003. Geographic distributions of Amazonian primates. Manaus, AM. Brazil. Available online at: <http://www.amazonnewspecies.com>
- Van Roosmalen, M. G. M. and Van Roosmalen, T. 2003. The description of a new marmoset genus *Callibella* (Callitrichinae, Primates), including its molecular phylogenetic status. *Neotropical Primates* 11 (1):1-10.
- Van Roosmalen, M. G. M., Van Roosmalen, T., Mittermeier, R. A. and Fonseca, G. A. B. da. 1998. A new and distinctive species of marmoset (Callitrichidae, Primates) from the lower Rio Aripuana, state of Amazonas, central Brazilian Amazonia. *Goeldiana Zoologia* (22): 1-27.
- Van Roosmalen, M. G. M., Van Roosmalen, T., Mittermeier, R. A. and Rylands, A. B. 2002. A Taxonomic review of the titi monkeys, genus *Callicebus* Thomas, 1903. with the description of the new species, *Callicebus bernhardi* and *Callicebus stephennashi*, from Brazilian Amazonia. *Neotrop. Primates* 10(suppl)
- Van Roosmalen, M. G. M., Van Roosmalen, T., Mittermeier, R. A. and Rylands, A. B. 2000. Two new species of marmoset, genus *Callithrix* Erxleben, 1777 (Callitrichidae, Primates), from the Tapajós/Madeira interfluvium, south central Amazonia, Brazil. *Neotrop. Primates* 8(1): 1-18.
- Van Roosmalen, M. G. M., Van Roosmalen, T., Mittermeier, R. A. and Fonseca, G. A. B. da. 1998. A new and distinctive species of marmoset (Callitrichidae, Primates) from the lower Rio Aripuana, state of Amazonas, central Brazilian Amazonia. *Goeldiana Zoologia* (22): 1-27.
- Van Roosmalen, M. G. M., Frenz L., Van Hooff P., de longh H. H. and H. Leirs. 2005 A New Species of Living Peccary (Mammalia: Tayassuidae) from the Brazilian Amazon. 1-20
- Van Staaden, M.J. 1994. *Suricata suricatta*. *Mammalian Species*, 483:1-8.
- Vasey, N. and I. Tattersall. 2002 Do Ruffed Lemurs form a Hybrid Zone? Distribution and Discovery of *Varecia*, with Systematics and Conservation Implications. *American Museum Novitates* 3376. 1-26.
- Vanitharani, J., A. Rajendran, P. J. J. Bates, D. L. Harrison and M. J. Pearch. 2003. A taxonomic reassessment of *Kerivoula lenis* Thomas, 1916 (Chiroptera: Vespertilionidae) including a first record from peninsular India. *Acta Chiropterologica*, 5(1): 49-60.

- Van Zyll de Jong, C. G. 1991. Speciation of the *Sorex cinereus* group. Pp. 65-73, in *The biology of the Soricidae* (J. S. Findley and T. L. Yates, eds.). *Special Publication, Museum of Southwestern Biology*, 1:1-91.
- Valdéz, M. and G. Ceballos, 1997. Conservation of endemic mammals of Mexico: The perote ground squirrel (*Spermophilus perotensis*). *Journal of Mammalogy* 78(1) 74-82.
- Velazco, M. P. and S. Solari. 2003. Taxonomia de *Platyrrhinus dorsalis* y *Platyrrhinus lineatus* (Chiroptera:Phyllostomidae) en Peru, *Journal of Neotropical Mammalogy* 10: 303-319.
- Velazco, M.P. 2005. Morphological Phylogeny of the Bat Genus *Platyrrhinus* Saussure, 1860 (Chiroptera: Phyllostomidae) with the Description of Four New Species. *Fieldiana: Zoology*, N.S.105: 1-54.
- Verheyen, W. N., M. Colyn and J. Huselmans. 1996. Reevaluation of the *Lophuromys nudicaudatus* Heller, 1991 species complex with a description of a new species from Zaire (Muridae-Rodentia). *Bulletin de L'Institut Royas des Sciences Naturelles de Belgique, Biologie*, 66: 241-273.
- Verheyen, W., J. L. J. Hulselmans, T. Dierckx, and E. Verheyen. 2002. The *Lophuromys flavopunctatus* Thomas 1888 s.l. species complex: a craniometric study with the description and genetic characterizatón of two new species (Rodentia: Muridae – Africa). *Bulletin de L'Institut Royal des Sciences Naturelles de Belgique*, 72: 141 – 182.
- Verheyen, W., T. Dierckx. And J. L. J. Hulselmans. 2000. The brush-furred rats of Angola and southern Congo: description of a new taxon of the *Lophuromys sikapuensis* species complex. *Bulletin de L'Institut Royal des Sciences Naturelles de Belgique*, 70: 253 - 267.
- Vié, J.C., V. Volobouev, L. Granjon, and J.L. Patton. 1996 A new species of *Isothrix* (Rodentia: Echimyidae) from French Guiana. *Mammalia*, 60(3):393 406.
- Vivar, E., V. Pacheco y M. Valqui. 1997. A new species of *Cryptotis* (Insectivora: soricidae) from Northern Peru. *American Museum Novitates*, 3202: 1-15.
- Vizcaíno, S. F. 1995. Identificación específica de las mju“mulitas”, género *Dasyopus* L. (Mammalia, Dasypodidae), del noroeste argentino. Descripción de una nueva especie. *Mastozoología Neotropical*, 2: 5-13.
- Von Helversen, O. and F. Mayer 2000. Comments on the proposed designation of neotypes for the nominal species *Vespertilio pipistrellus* Schreber, 1774 and *V. pygmaeus* Leach, 1825 (currently *Pipistrellus pipistrellus* and *P. pygmaeus*, Mammalia, Chiroptera). *Bulletin of Zoological Nomenclature* 57: 49-50.
- Von Helversen O, Heller KG, Mayer F, et al. 2001. Cryptic mammalian species: a new species of whiskered bat (*Myotis alcathoe* n sp) in Europe. *NATURWISSENSCHAFTEN* 88 (5): 217-223
- Voss, R.S. 1991. An Introduction to the Neotropical Muroid Rodent Genus *Zygodontomys*. *Bulletin. American Museum Natural Histoty*. 210
- Voss, R. S. and M.N.F. Da Silva. 2001. Revisionary notes on Neotropical porcupines (Rodentia:Erethizontidae). 2 A review of the *Coendou vestitus* group with descriptions of two new species from Amazonia. *American Museum Novitates* 3351: 1- 36.
- Voss, R. S. Lunde, D. P. And N. B. Simmons. 2001. The mammals of Paracou, French Guiana: A Neotropical Lowland Rainforest Fauna. Part 2 Nonvolant species. *Bulletin of the American Museum of Natural History*. 263.pp
- Voss, R. S.; Gómez-Velarde, M. and V. Pacheco. 2002. A new genus for *Aepeomys fuscatus* Allen, 1912 and *Oryzomys intectus* Thomas, 1921: Enigmatic Murid Rodents from Anden Cluod Forest. *American Museum Novitates* 3373:19.
- Voss, R.S. Gardner A.I. and S.A. Jansa. 2004. On the Relationships of “*Marmosa*” *Formosa* Shamel, 1930 (Marsupialia: Didelphidae), a Phylogenetic Puzzle from the Chaco of Northern

- Argentina. *American Museum Novitates* 3442: 1-18.
- Voss, R.S., Tarifa T. and Yensen E. 2004. An Introduction to *Marmosops* (Marsupialia: Didelphidae), with the Description of a New Species from Bolivia and Notes on the Taxonomy and Distribution of Other Bolivian Forms. *American Museum Novitates*. 3466: 1- 40.
- Voss, R.S. Lunde D.P. and Jansa S.A. 2005. On the Contents of *Gracilinanus* Gardner and Creighton, 1989, with the Description of a Previously Unrecognized Clade of Small Didelphid Marsupials. *American Museum Novitates*, 3482: 1-34.
- Volleth, M, G. Bronner, G. Gópfert, K.-G. Heller, O. Von Helversen and H. –S. Yong.2001. Karyotype comparison and Phylogenetic relationships of Pipistrellus –like bats (Vespertionidae; Chiroptera; Mammalia). *Chromosome Research* 9 25-4
- Wada, S., Oishi M. and Yamada T.K. 2003. A newly discovered species of living baleen whale. Nature Publishing Group, Vol 426: [www.nature.com/nature](http://www.nature.com/nature)
- Wallis, J. 2000. New species of owl monkey re-discovered...30 years later. *ASP Bulletin* 24(2):5
- Walther, F. R. 1990. Gazelles and related species. Pp. 462-484. *In Grzimek's Encyclopedia of Mammals*, Volume 5. Edited by S. P. Parker. McGraw-Hill, New York.
- Weksler M, Geise L, Cerqueira R. 1999. A new species of *Oryzomys* (Rodentia, Sigmondontinae) from southeast Brazil, with comments on the classification of the *O. capito* species group. *Zoological Journal of the Linnean Society* 125: 445-462.
- Jack-Ximenes, G. E., M. Vivo and A. P. Percequillo. Taxonomy of pygmy rice rats genus *Oligoryzomys* Bangs, 1900 (Rodentia, Sigmodontinae) of the Brazilian Cerrado, with description of two new species. *Archivos do Museu Nacional* 18 (1). 113-130.
- Weksler, M. and C. R. Bonvicino. 2004. A new species of *Rhipidomys* (Rodentia, Muroidea) from North-eastern Brazil. *Archivos do Museu Nacional* 18 (1). 131-199.
- Weksler, M., Geise L. and R. Cerqueira. 1999. A new species of *Oryzomys* (Rodentia, Sigmondontinae) from southeast Brazil, with comments on the classification of the *O. capito* species group. *Zoological Journal of the Linnean Society*.125: 445–462..
- Wei-Dong, L. and A. T. Smith. 2005. Dramatic decline of the threatened Ili pika *Ochotona Iliensis* (Lagomorpha: Ochotonidae) in Xinjiang, China. *Oryx* 39 (1) 30-34.
- Wilson, D. E., and D. M. Reeder (eds). 1993. *Mammal Species of the World*. Second Edition. Smithsonian Institution Press, Washington D.C.
- Wilson, D. E., and D. M. Reeder (eds). 2005. *Mammal Species of the World*. A Taxonomic and Geographic Reference, Third Edition. John Hopkins University Press, Baltimore, USA.
- Wolsan, M. and R. Hutterer. 1998. A list of living species of shrews. Pp. 425 – 448, in: *Evolution of shrews* (J. M.m Wojcik and M. Wolsan, eds). Mammal Research Institute, Polish Academy of Sciences, Bailoweza.
- Woodman, N. 2002. A new species of small-eared shrew from Colombia and Venezuela (Mammalia: Soricomorpha: Soricidae: Genus *Cryptotis*. *Proceedings of the Biological Society of Washington* 115 (2):249-272.
- Woodman, N. and R. Timm. 1992 A new species of small-eared shrew genus *Cryptotis* (Insectivora Soricidae :). from Honduras *Proceedings of the Biological Society of Washington* 105 : 1-12.
- Woodman, N. and R. Timm. 2006. Characters and phylogenetic relationships of nectar-feeding bats, with descriptions of new Lonchophylla from western South America (Mammalia: Chiroptera: Phyllostomidae: Lonchophyllini). *Proceedings of the Biological Society of Washington* 119:437–476.

- Yoder, et al. 2000. Remarkable species diversity in Malagasy mouse lemurs (primates, *Microcebus*). PNAS. 97(21): 11325–11330.
- Yongzu, Z. et al. 1997. *Distribution of mammalian species in China*. China Forestry Publishing House, Beijing.
- Yoshiyuki, M., and Y. Imaizumi. 1991. Taxonomic status of the large mole from the Echigo plain, central Japan, with description of a new species (Mammalia, Insectivora, Talpidae). *Bulletin of the National Science Museum (Tokyo), ser. A*, 17:101-110.
- Zimmerman, E., Cepok, S., Rakotoarison, N., Zietemann, V. and Radespiel, U. 1998. Sympatric mouse lemurs in north-west Madagascar: A new rufous mouse lemur species. *Folia Primatologica*, 69: 106-114.
